# Supplementary material for: Enhanced visible-light-active photocatalysts: incorporating bismuth tungstate into graphitic carbon nitride for an efficient condensation reaction
Source: Royal Society of Chemistry journal article supplement (doi:10.1039/d4nj01370k), 2024-01-01
Supplement: d4nj01370k1.pdf [file d4nj01370k1.pdf]

## "Enhanced Visible-Light-Active Photocatalysts: Incorporating Bismuth Tungstate into Graphitic Carbon Nitride for Efficient Condensation Reaction"

Murugesan Shobika, Selvaraj Mohana Roopan\*

Chemistry of Heterocycles & Natural Product Research Laboratory, Department of Chemistry, School of Advanced Sciences, Vellore Institute of Technology, Vellore 632014, Tamil Nadu, India.

\* Correspondence: [mohanarooopans@vit.ac.in](mailto:mohanarooopans@vit.ac.in); Tel.: +0416-220-2313

---

### Supporting Information

#### Table of Contents

|                                                                                         |     |
|-----------------------------------------------------------------------------------------|-----|
| 1. General information-----                                                             | S2  |
| 2. Characterization Details-----                                                        | S2  |
| 3. XRD spectra -----                                                                    | S3  |
| 4. FT-IR and UV-Vis DRS spectra-----                                                    | S4  |
| 5. Band gap and PL spectra-----                                                         | S5  |
| 6. EIS spectra, Particle size and d-spacing calculation-----                            | S6  |
| 7. XPS spectra-----                                                                     | S7  |
| 8. BET analysis-----                                                                    | S8  |
| 9. Radical scavenging study-----                                                        | S9  |
| 10. Spectral and analytical characterization -----                                      | S10 |
| 11. <sup>1</sup> H, <sup>13</sup> C NMR, FT-IR and Mass Spectra of Products (4a-q)----- | S20 |

### **Text S1. General Information (Materials):**

Sodium tungstate dihydrate was procured from Thermo Fisher Scientific, while melamine was sourced from SDFCL. Furthermore, a range of additional chemicals, including bismuth nitrate hexahydrate, 1,3-cyclohexanedione, TEOF, and various amine, were acquired from Avra Synthesis Pvt. Ltd, India. These reagents were of analytical grade and were utilized in their original state without the need for further purification.

### **Text S2. Characterization Details**

The as-prepared materials, including g-C<sub>3</sub>N<sub>4</sub>, Bi<sub>2</sub>WO<sub>6</sub>, and Bi<sub>2</sub>WO<sub>6</sub>/g-C<sub>3</sub>N<sub>4</sub> composites with varying weight % ratios, were subjected to comprehensive characterization using a variety of physicochemical techniques. X-ray Photoelectron Spectroscopy (XPS) analyses were conducted at the Central Instrument Facility (CIF), Pondicherry University, Pondicherry, India, utilizing a Thermo Scientific instrument equipped with Al- K $\alpha$  micro-focused monochromator with variable spot size covering an energy range of 100-4000 eV. The XPS setup was equipped with a dual beam source for charge compensation. Additionally, the analyser utilized was a 180° double focusing hemispherical analyser with a 128-channel detector. This technique allowed for the determination of elemental composition and chemical states within the materials. Structural elucidation of the as-prepared materials was carried out using a Bruker D8 Advance X-ray powder diffractometer, employing CuK $\alpha$  radiation ( $\lambda=1.54058$ ) and a movable detector. The scanning range of 5°–90° as a function of the angle 2 $\theta$  enabled the analysis of the crystalline phases present. Transmission Electron Microscope (TEM) analysis was performed on a Model FEI –TECNAI G2-20 TWIN, operating at 200 kV, to investigate the morphology and nanostructure of the synthesized materials at the microscopic level. Fourier Transform Infrared (FTIR) spectroscopy was conducted on a Shimadzu spectrophotometer using KBr pellets, covering the spectral range of 4000-400 cm<sup>-1</sup>, to identify functional groups and chemical bonds present in the materials. UV-Vis diffuse reflection spectra were acquired using a Jasco V-670 spectrometer (Range: 190-3200 nm), providing insights into the optical properties and bandgap energies of the materials. Photoluminescence (PL) spectra were recorded using a Shimadzu RF-700 spectrometer system, enabling the investigation of light emission properties, which are indicative of electronic transitions within the materials. The formation of organic compounds was confirmed through <sup>1</sup>H and <sup>13</sup>C NMR (Bruker 400MHz) spectroscopy, providing insights into molecular structure and composition. High-resolution mass

spectrometry (HR-MS) (XEVO-G2-XS-QTOF) (Waters, USA) determined precise molecular weights and molecular formulas, while gas chromatography-mass spectrometry (GC-MS) (Perkin Elmer Clarus 680 & 600) offered complementary data on compound purity and identity. This combined approach ensured accurate and reliable confirmation of compound formation.

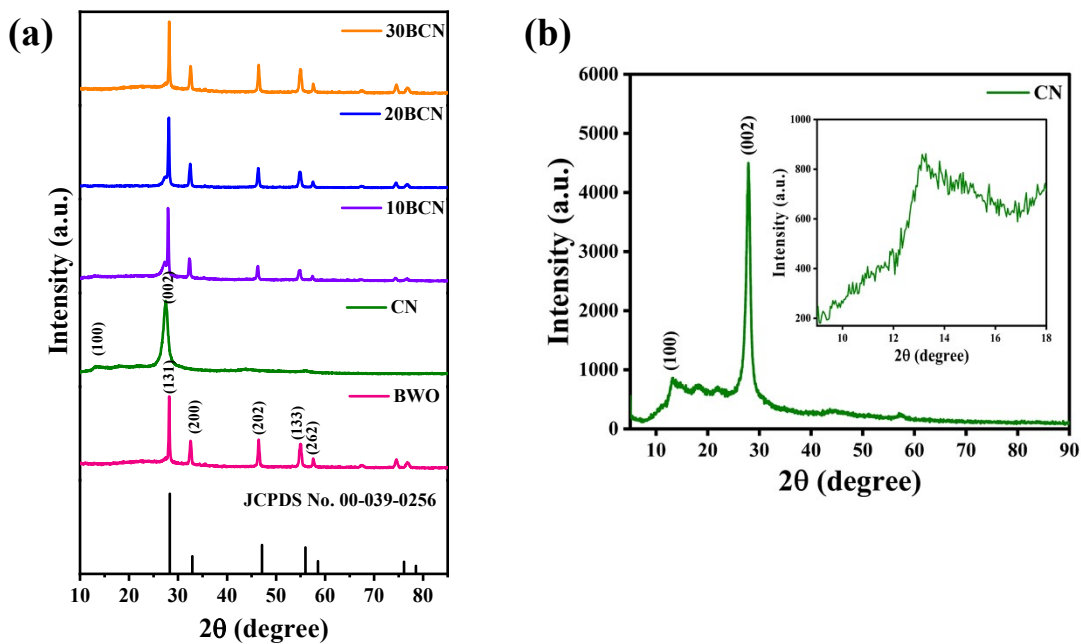

**Fig. S1** (a) The XRD pattern of BWO, CN, 10BCN, 20BCN, and 30BCN; (b) The XRD pattern of CN and its enlarged image.

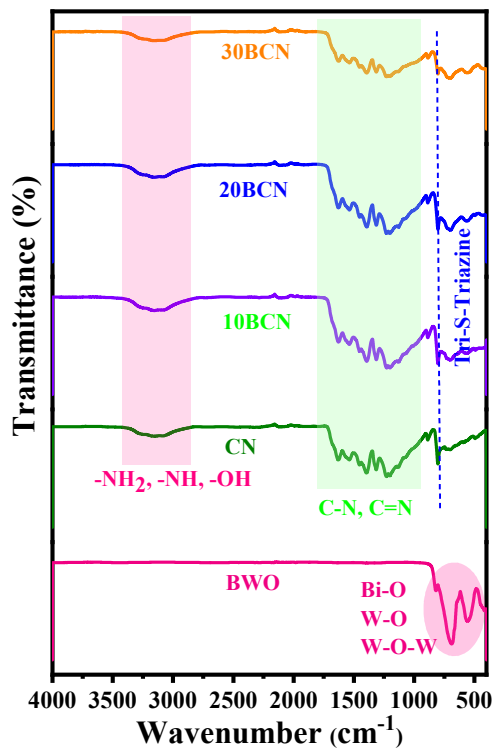

Fig. S2 FT-IR spectrum of BWO, CN, 10BCN, 20BCN, and 30BCN.

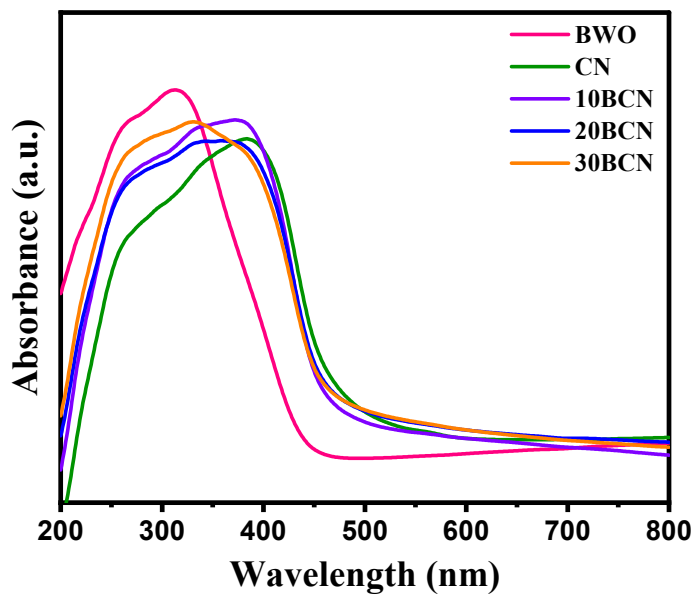

Fig. S3 UV-vis DRS spectra BWO, CN, 10BCN, 20BCN, and 30BCN.

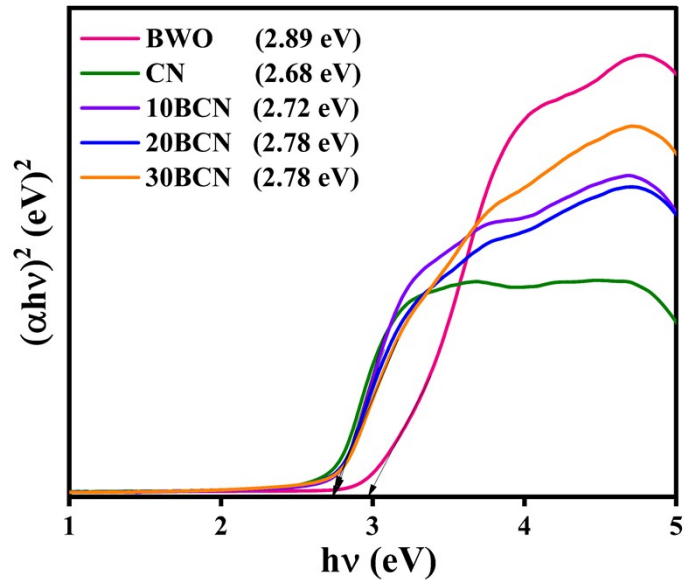

**Fig. S4** Band gap spectra BWO, CN, 10BCN, 20BCN, and 30BCN.

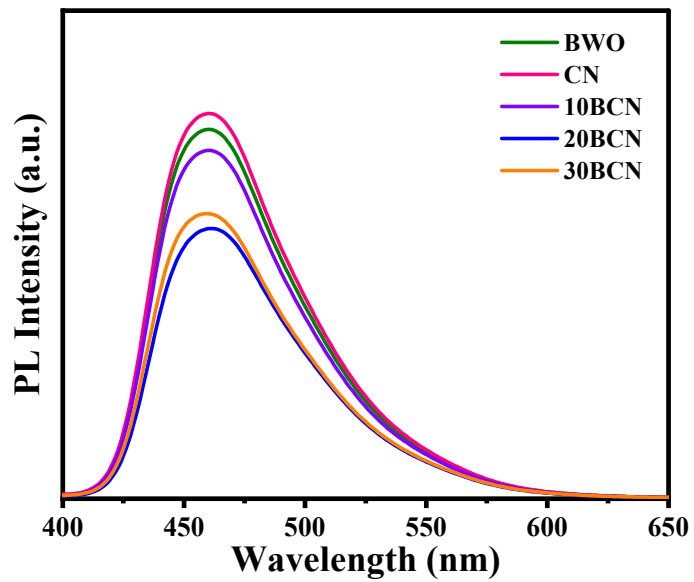

**Fig. S5** PL Spectra of BWO, CN, 10BCN, 20BCN, and 30BC

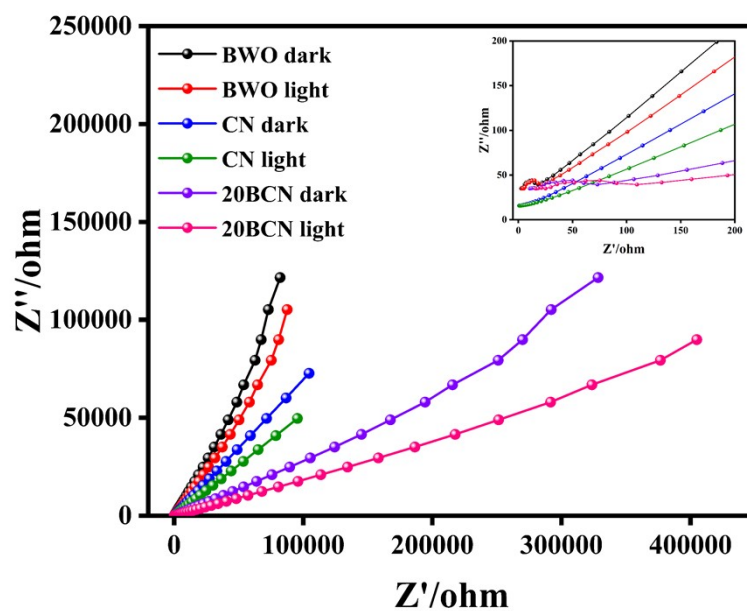

Fig. S6 EIS spectra BWO, CN and 20BCN with both light and dark condition

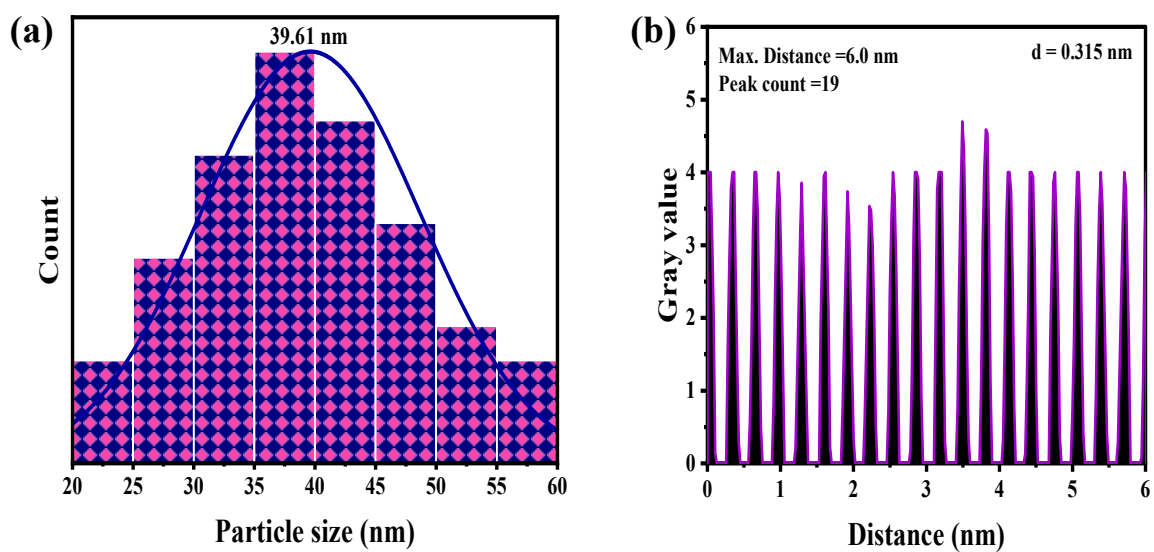

Fig. S7 (a) Histogram of particle sizes and (b) d-spacing calculation.

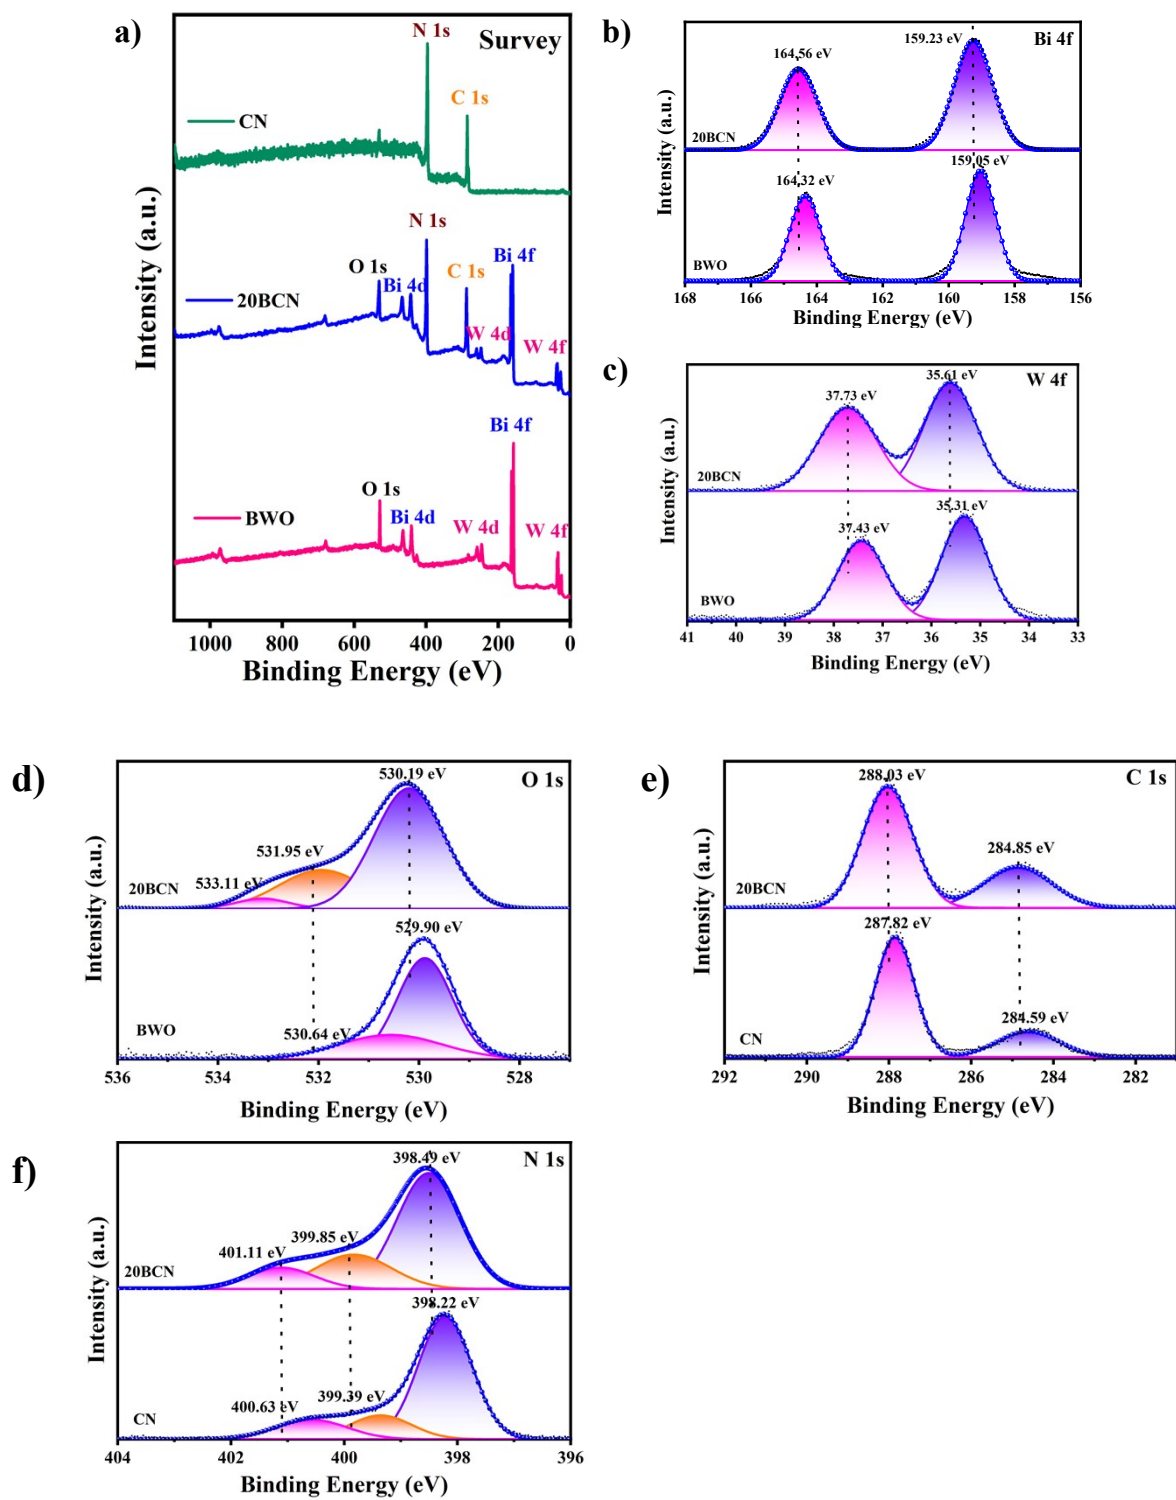

Fig. S8 XPS spectra of BWO, CN and 20BCN a) survey spectra and deconvoluted spectra of b) Bi 4f, c) W 4f, d) O 1s, e) C 1s and f) N 1s.

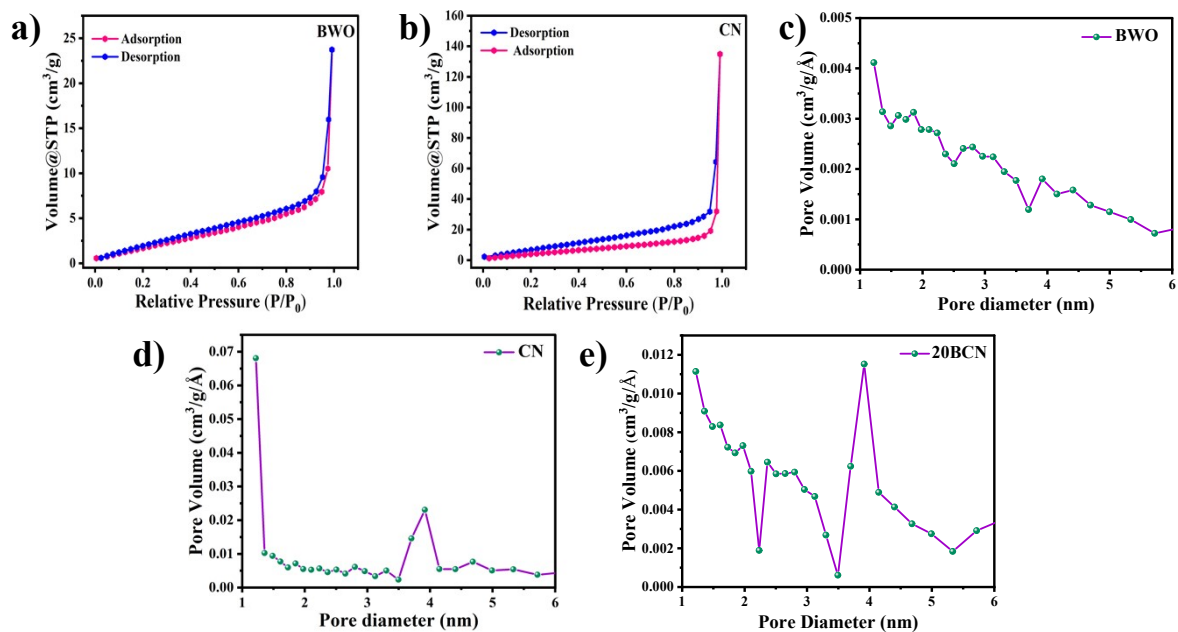

**Fig. S9** N<sub>2</sub> adsorption-desorption isotherms of (a) BWO and (b) CN; Pore volume of (c) BWO, (d) CN and (e) 20BCN.

**Table S1**

| Sample Code | Surface area (m <sup>2</sup> /g) | Pore Volume (cm <sup>3</sup> /g) | Average pore diameter (nm) |
|-------------|----------------------------------|----------------------------------|----------------------------|
| BWO         | 18.711                           | 0.041                            | 1.220                      |
| CN          | 99.481                           | 0.187                            | 1.218                      |
| 20BCN       | 58.883                           | 0.152                            | 3.917                      |



## Radical Scavenging Study

Free radical trapping study by TEMPO

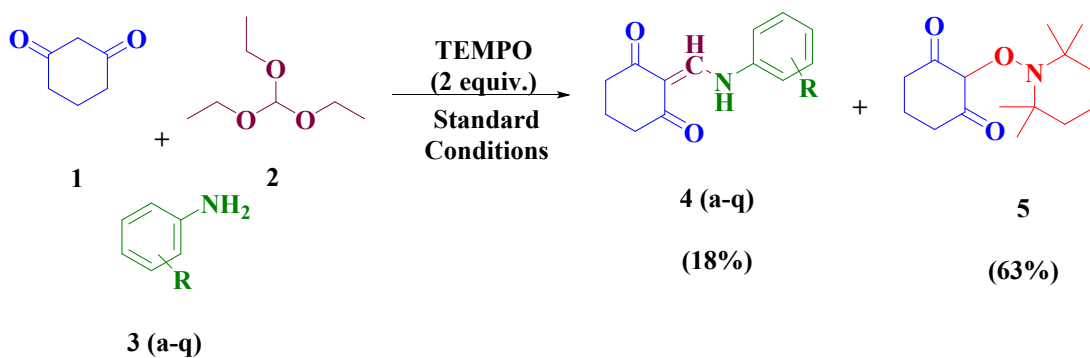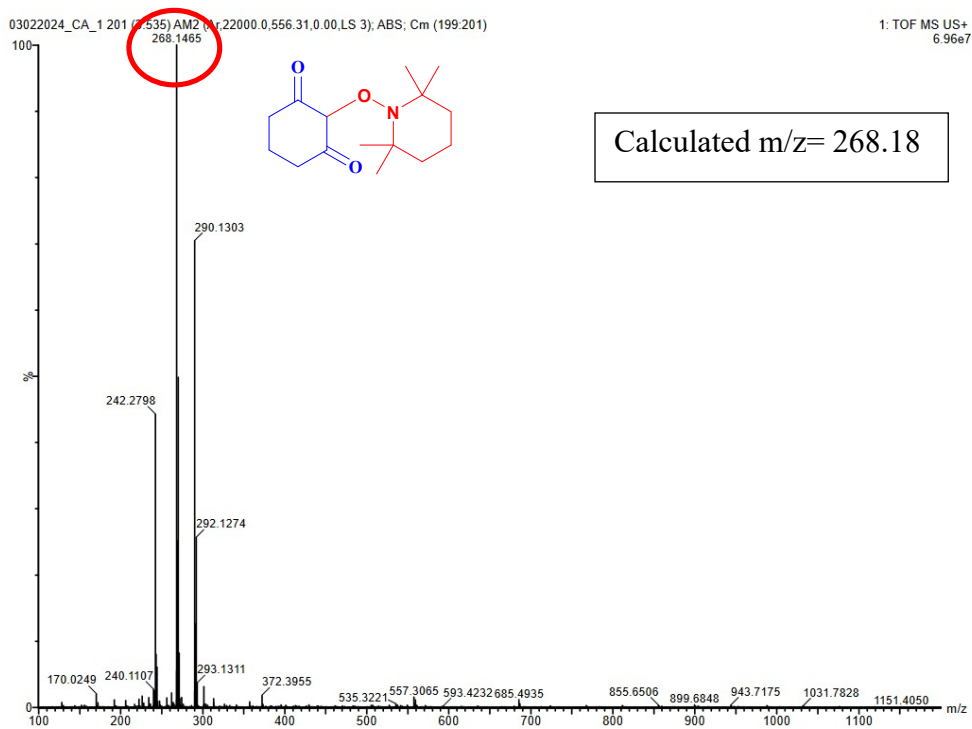

Fig. S10 HR-MS data of compound 5.

Spectral and analytical characterization of the 2-((arylamino)methylene)cyclohexane-1,3-dione derivatives (4a-q).

| 1                                                                                  | 2-((phenylamino)methylene)cyclohexane-1,3-dione                                                                                                                                                                                                             |                                                                                     |
|------------------------------------------------------------------------------------|-------------------------------------------------------------------------------------------------------------------------------------------------------------------------------------------------------------------------------------------------------------|-------------------------------------------------------------------------------------|
| <b>Molecular Formula</b>                                                           | C <sub>13</sub> H <sub>13</sub> NO <sub>2</sub>                                                                                                                                                                                                             | 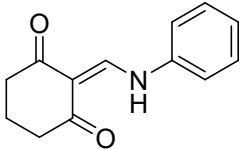 |
| <b>Molecular Weight (g/mol)</b>                                                    | 215.0946                                                                                                                                                                                                                                                    |                                                                                     |
| <b>Colour</b>                                                                      | Yellow solid/ crystal                                                                                                                                                                                                                                       |                                                                                     |
| <b>Melting point (°C)</b>                                                          | 116-118                                                                                                                                                                                                                                                     |                                                                                     |
| <b>FT-IR, v/cm<sup>-1</sup></b>                                                    | 3474-3249 (NH); 3057(CH aromatic); 2944 (CH <sub>2</sub> ); 1661,1659 (2C=O); 1596 (C=C); 1455 (C-C stretch in aromatic ring).                                                                                                                              |                                                                                     |
| <b><sup>1</sup>H-NMR (400 MHz, DMSO-d<sub>6</sub>, Me<sub>4</sub>Si) (ppm): δ</b>  | 1.87-1.94 (qu, <i>J</i> = 6.4 Hz, 2H), 2.41-2.44 (t, <i>J</i> = 6.4 Hz, 2H), 2.50-2.52 (t, <i>J</i> = 6.4 Hz, 2H), 7.24-7.27 (t, <i>J</i> = 6.8 Hz, 1H), 7.41-7.50 (m, 4H), 8.49-8.52 (d, <i>J</i> = 13.6 Hz, 1H), 12.67-12.71 (d, <i>J</i> = 13.6 Hz, 1H). |                                                                                     |
| <b><sup>13</sup>C-NMR (100 MHz, DMSO-d<sub>6</sub>, Me<sub>4</sub>Si) (ppm): δ</b> | 19.6, 37.7, 38.0, 110.1, 119.0, 126.6, 130.3, 139.0, 150.8, 195.9, 200.0.                                                                                                                                                                                   |                                                                                     |
| <b>GC-MS</b>                                                                       | Calculated<br>215.0946                                                                                                                                                                                                                                      | Found<br>215.252                                                                    |

| 2                                                                                 | 2-(((2,5-dimethylphenyl)amino)methylene)cyclohexane-1,3-dione                                                                                                                                                                                                                                                        |                                                                                       |
|-----------------------------------------------------------------------------------|----------------------------------------------------------------------------------------------------------------------------------------------------------------------------------------------------------------------------------------------------------------------------------------------------------------------|---------------------------------------------------------------------------------------|
| <b>Molecular Formula</b>                                                          | C <sub>15</sub> H <sub>17</sub> NO <sub>2</sub>                                                                                                                                                                                                                                                                      | 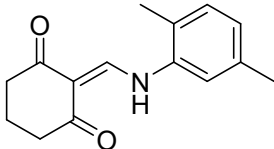 |
| <b>Molecular Weight (g/mol)</b>                                                   | 243.1259                                                                                                                                                                                                                                                                                                             |                                                                                       |
| <b>Colour</b>                                                                     | Brown solid                                                                                                                                                                                                                                                                                                          |                                                                                       |
| <b>Melting point (°C)</b>                                                         | 134-135                                                                                                                                                                                                                                                                                                              |                                                                                       |
| <b>FT-IR, v/cm<sup>-1</sup></b>                                                   | 3591-3508 (NH); 3248 (CH aromatic); 2948 (CH <sub>2</sub> ), 1661,1659 (2C=O); 1592 (C=C); 1469 (C-C stretch in aromatic ring).                                                                                                                                                                                      |                                                                                       |
| <b><sup>1</sup>H-NMR (400 MHz, DMSO-d<sub>6</sub>, Me<sub>4</sub>Si) (ppm): δ</b> | 1.88-1.95 (qu, <i>J</i> = 6.4 Hz, 2H), 2.27 (s, 3H), 2.31 (s, 3H) 2.41-2.45 (t, <i>J</i> = 6.4 Hz, 2H), 2.50-2.51 (t, <i>J</i> = 6.4 Hz, 2H), 6.98-7.00 (d, <i>J</i> = 7.6 Hz, 1H), 7.17-7.19 (d, <i>J</i> = 8 Hz, 1H), 7.43 (s, 1H) 8.55-8.58 (d, <i>J</i> = 13.2 Hz, 1H), 13.02-13.05 (d, <i>J</i> = 13.2 Hz, 1H). |                                                                                       |

|                                                                                    |                                                                                                     |                   |
|------------------------------------------------------------------------------------|-----------------------------------------------------------------------------------------------------|-------------------|
| <b><sup>13</sup>C-NMR (100 MHz, DMSO-d<sub>6</sub>, Me<sub>4</sub>Si) (ppm): δ</b> | 16.9, 19.7, 21.0, 37.6, 37.8, 110.3, 117.2, 124.9, 127.2, 131.4, 137.1, 137.6, 150.8, 195.8, 200.5. |                   |
| <b>HR-MS ((ESI +ve) <i>m/z</i> [M+H]<sup>+</sup>)</b>                              | Calculated<br>243.1259                                                                              | Found<br>244.1345 |

|                                                                                    |                                                                                                                                                                                                                                                                                                                                                                                              |                                                                                     |
|------------------------------------------------------------------------------------|----------------------------------------------------------------------------------------------------------------------------------------------------------------------------------------------------------------------------------------------------------------------------------------------------------------------------------------------------------------------------------------------|-------------------------------------------------------------------------------------|
| <b>3</b>                                                                           | <b>2-(((2-ethylphenyl)amino)methylene)cyclohexane-1,3-dione</b>                                                                                                                                                                                                                                                                                                                              |                                                                                     |
| <b>Molecular Formula</b>                                                           | C <sub>15</sub> H <sub>17</sub> NO <sub>2</sub>                                                                                                                                                                                                                                                                                                                                              | 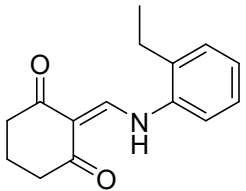 |
| <b>Molecular Weight (g/mol)</b>                                                    | 243.1259                                                                                                                                                                                                                                                                                                                                                                                     |                                                                                     |
| <b>Colour</b>                                                                      | Brownish yellow solid                                                                                                                                                                                                                                                                                                                                                                        |                                                                                     |
| <b>Melting point (°C)</b>                                                          | 69-70                                                                                                                                                                                                                                                                                                                                                                                        |                                                                                     |
| <b>FT-IR, ν/cm<sup>-1</sup></b>                                                    | 3359-3194 (NH); 3071 (CH aromatic); 2960 (CH <sub>2</sub> ), 1670,1668 (2C=O); 1575 (C=C); 1473 (C-C stretch in aromatic ring).                                                                                                                                                                                                                                                              |                                                                                     |
| <b><sup>1</sup>H-NMR (400 MHz, DMSO-d<sub>6</sub>, Me<sub>4</sub>Si) (ppm): δ</b>  | 1.19-1.22 (t, <i>J</i> = 7.2 Hz, 3H), 1.89-1.95 (qu, <i>J</i> = 6.4 Hz, 2H), 2.41-2.45 (t, <i>J</i> = 6.4 Hz, 2H), 2.52-2.55 (t, <i>J</i> = 6.4 Hz, 2H), 2.66-2.72 (q, <i>J</i> = 7.6 Hz, 2H), 7.22-7.24 (t, <i>J</i> = 7.6 Hz, 1H), 7.30-7.34 (t, <i>J</i> = 8 Hz, 2H), 7.57-7.59 (d, <i>J</i> = 8 Hz, 1H), 8.54-8.57 (d, <i>J</i> = 13.2 Hz, 1H), 13.18-13.21 (d, <i>J</i> = 13.2 Hz, 1H). |                                                                                     |
| <b><sup>13</sup>C-NMR (100 MHz, DMSO-d<sub>6</sub>, Me<sub>4</sub>Si) (ppm): δ</b> | 14.4, 19.7, 24.2, 37.6, 37.8, 110.4, 117.5, 126.9, 128.1, 130.0, 134.1, 136.8, 151.4, 195.8, 200.7.                                                                                                                                                                                                                                                                                          |                                                                                     |
| <b>HR-MS ((ESI +ve) <i>m/z</i> [M+H]<sup>+</sup>)</b>                              | Calculated<br>243.1259                                                                                                                                                                                                                                                                                                                                                                       | Found<br>244.1342                                                                   |

|                                 |                                                                                                                                 |                                                                                       |
|---------------------------------|---------------------------------------------------------------------------------------------------------------------------------|---------------------------------------------------------------------------------------|
| <b>4</b>                        | <b>2-(((4-nitrophenyl)amino)methylene)cyclohexane-1,3-dione</b>                                                                 |                                                                                       |
| <b>Molecular Formula</b>        | C <sub>13</sub> H <sub>12</sub> N <sub>2</sub> O <sub>4</sub>                                                                   | 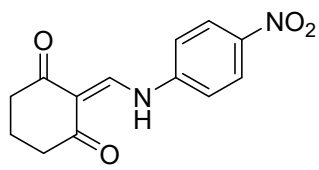 |
| <b>Molecular Weight (g/mol)</b> | 260.0797                                                                                                                        |                                                                                       |
| <b>Colour</b>                   | Yellow solid                                                                                                                    |                                                                                       |
| <b>Melting point (°C)</b>       | 176-177                                                                                                                         |                                                                                       |
| <b>FT-IR, ν/cm<sup>-1</sup></b> | 3464-3272 (NH); 3074 (CH aromatic); 2960 (CH <sub>2</sub> ), 1670,1668 (2C=O); 1579 (C=C); 1501 (C-C stretch in aromatic ring). |                                                                                       |

|                                                                                    |                                                                                                                                                                                                                                                                               |                  |
|------------------------------------------------------------------------------------|-------------------------------------------------------------------------------------------------------------------------------------------------------------------------------------------------------------------------------------------------------------------------------|------------------|
| <b><sup>1</sup>H-NMR (400 MHz, DMSO-d<sub>6</sub>, Me<sub>4</sub>Si) (ppm): δ</b>  | 1.89-1.96 (qu, <i>J</i> = 6.8 Hz, 2H), 2.46-2.49 (t, <i>J</i> = 6.8 Hz, 2H), 2.53-2.56 (t, <i>J</i> = 6.8 Hz, 2H), 7.74-7.76 (d, <i>J</i> = 9.2 Hz, 2H), 8.23-8.26 (d, <i>J</i> = 9.2 Hz, 2H), 8.51-8.55 (d, <i>J</i> = 13.2 Hz, 1H), 12.60-12.63(d, <i>J</i> = 13.2 Hz, 1H). |                  |
| <b><sup>13</sup>C-NMR (100 MHz, DMSO-d<sub>6</sub>, Me<sub>4</sub>Si) (ppm): δ</b> | 19.3, 37.8, 38.2, 111.6, 119.4, 125.8, 144.7,144.9, 149.9, 196.2, 200.6.                                                                                                                                                                                                      |                  |
| <b>GC-MS</b>                                                                       | Calculated<br>260.0797                                                                                                                                                                                                                                                        | Found<br>260.179 |

|                                                                                    |                                                                                                                                                                                                                                                                                                                                                                           |                                                                                     |
|------------------------------------------------------------------------------------|---------------------------------------------------------------------------------------------------------------------------------------------------------------------------------------------------------------------------------------------------------------------------------------------------------------------------------------------------------------------------|-------------------------------------------------------------------------------------|
| <b>5</b>                                                                           | <b>2-(((2-methoxyphenyl)amino)methylene)cyclohexane-1,3-dione</b>                                                                                                                                                                                                                                                                                                         |                                                                                     |
| <b>Molecular Formula</b>                                                           | C <sub>14</sub> H <sub>15</sub> NO <sub>3</sub>                                                                                                                                                                                                                                                                                                                           | 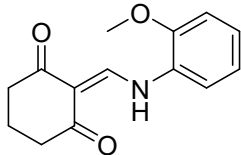 |
| <b>Molecular Weight (g/mol)</b>                                                    | 245.1052                                                                                                                                                                                                                                                                                                                                                                  |                                                                                     |
| <b>Colour</b>                                                                      | Yellow solid                                                                                                                                                                                                                                                                                                                                                              |                                                                                     |
| <b>Melting point (°C)</b>                                                          | 119-120                                                                                                                                                                                                                                                                                                                                                                   |                                                                                     |
| <b>FT-IR, v/cm<sup>-1</sup></b>                                                    | 3337-3195 (NH); 3067 (CH aromatic); 2942 (CH <sub>3</sub> ); 2874 (CH <sub>2</sub> ), 1660,1658 (2C=O); 1602 (C=C); 1491 (C-C stretch in aromatic ring).                                                                                                                                                                                                                  |                                                                                     |
| <b><sup>1</sup>H-NMR (400 MHz, DMSO-d<sub>6</sub>, Me<sub>4</sub>Si) (ppm): δ</b>  | 1.87-1.94 (qu, <i>J</i> = 6.8 Hz, 2H), 2.41-2.44 (t, <i>J</i> = 6.8 Hz, 2H), 2.49-2.52 (t, <i>J</i> = 6.8 Hz, 2H), 3.92 (s, 3H), 7.05-7.07 (t, <i>J</i> = 1.2 Hz, 1H), 7.15-7.17 (d, <i>J</i> = 1.2 Hz, 1H), 7.21-7.25 (t, <i>J</i> = 1.2 Hz, 1H), 7.644-7.646 (d, <i>J</i> = 0.8 Hz, 1H) 8.55-8.59 (d, <i>J</i> = 13.6 Hz, 1H), 12.96-13.00 (d, <i>J</i> = 13.6 Hz, 1H). |                                                                                     |
| <b><sup>13</sup>C-NMR (100 MHz, DMSO-d<sub>6</sub>, Me<sub>4</sub>Si) (ppm): δ</b> | 19.6, 37.7, 38.0, 55.3, 56.6, 110.4, 112.5, 116.5, 121.8, 127.1, 127.6, 149.4, 149.4, 195.8, 200.1.                                                                                                                                                                                                                                                                       |                                                                                     |
| <b>HR-MS ((ESI +ve) <i>m/z</i> [M+H]<sup>+</sup>)</b>                              | Calculated<br>245.1052                                                                                                                                                                                                                                                                                                                                                    | Found<br>246.1140                                                                   |

|                                 |                                                                   |  |
|---------------------------------|-------------------------------------------------------------------|--|
| <b>6</b>                        | <b>2-(((3-methoxyphenyl)amino)methylene)cyclohexane-1,3-dione</b> |  |
| <b>Molecular Formula</b>        | C <sub>14</sub> H <sub>15</sub> NO <sub>3</sub>                   |  |
| <b>Molecular Weight (g/mol)</b> | 245.1052                                                          |  |
| <b>Colour</b>                   | Yellow solid                                                      |  |

|                                                                                    |                                                                                                                                                                                                                                                                                                                                                  |                                                                                     |
|------------------------------------------------------------------------------------|--------------------------------------------------------------------------------------------------------------------------------------------------------------------------------------------------------------------------------------------------------------------------------------------------------------------------------------------------|-------------------------------------------------------------------------------------|
| <b>Melting point (°C)</b>                                                          | 68-70                                                                                                                                                                                                                                                                                                                                            | 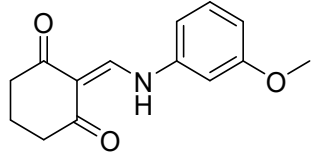 |
| <b>FT-IR, v/cm<sup>-1</sup></b>                                                    | 3633-3480 (NH); 3082 (CH aromatic); 2954 (CH <sub>3</sub> ); 2874 (CH <sub>2</sub> ), 1662,1660 (2C=O); 1573 (C=C); 1500 (C-C stretch in aromatic ring).                                                                                                                                                                                         |                                                                                     |
| <b><sup>1</sup>H-NMR (400 MHz, DMSO-d<sub>6</sub>, Me<sub>4</sub>Si) (ppm): δ</b>  | 1.87-1.94 (qu, <i>J</i> = 6.4 Hz, 2H), 2.41-2.44 (t, <i>J</i> = 6.4 Hz, 2H), 2.48-2.51 (t, <i>J</i> = 6.4 Hz, 2H), 3.80 (s, 3H), 6.82-6.83 (dd, <i>J</i> = 8 Hz, 1H), 7.01-7.03 (dd, <i>J</i> = 8 Hz, 1H), 7.08-7.09 (t, <i>J</i> = 2.4 Hz, 1H), 7.31-7.35 (t, 1H) 8.48-8.52 (d, <i>J</i> = 14 Hz, 1H), 12.64-12.67 (d, <i>J</i> = 13.6 Hz, 1H). |                                                                                     |
| <b><sup>13</sup>C-NMR (100 MHz, DMSO-d<sub>6</sub>, Me<sub>4</sub>Si) (ppm): δ</b> | 19.6, 37.7, 38.0, 55.3, 55.9, 104.6, 110.1, 110.9, 112.6, 131.1, 140.3, 150.9, 160.8, 195.9, 200.1.                                                                                                                                                                                                                                              |                                                                                     |
| <b>GC-MS</b>                                                                       | Calculated<br>245.1052                                                                                                                                                                                                                                                                                                                           | Found<br>245.227                                                                    |

|                                                                                    |                                                                                                                                                                                                                                                                                             |                                                                                       |
|------------------------------------------------------------------------------------|---------------------------------------------------------------------------------------------------------------------------------------------------------------------------------------------------------------------------------------------------------------------------------------------|---------------------------------------------------------------------------------------|
| <b>7</b>                                                                           | <b>2-(((4-methoxyphenyl)amino)methylene)cyclohexane-1,3-dione</b>                                                                                                                                                                                                                           |                                                                                       |
| <b>Molecular Formula</b>                                                           | C <sub>14</sub> H <sub>15</sub> NO <sub>3</sub>                                                                                                                                                                                                                                             | 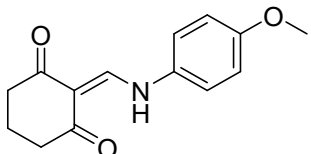 |
| <b>Molecular Weight (g/mol)</b>                                                    | 245.1052                                                                                                                                                                                                                                                                                    |                                                                                       |
| <b>Colour</b>                                                                      | Yellow solid                                                                                                                                                                                                                                                                                |                                                                                       |
| <b>Melting point (°C)</b>                                                          | 117-118                                                                                                                                                                                                                                                                                     |                                                                                       |
| <b>FT-IR, v/cm<sup>-1</sup></b>                                                    | 3460-3239 (NH); 3079 (CH aromatic); 2945 (CH <sub>3</sub> ); 2854 (CH <sub>2</sub> ), 1659,1658 (2C=O); 1588 (C=C); 1519 (C-C stretch in aromatic ring).                                                                                                                                    |                                                                                       |
| <b><sup>1</sup>H-NMR (400 MHz, DMSO-d<sub>6</sub>, Me<sub>4</sub>Si) (ppm): δ</b>  | 1.88-1.93 (qu, <i>J</i> = 6.4 Hz, 2H), 2.39-2.42 (t, <i>J</i> = 6.4 Hz, 2H), 2.46-2.50 (t, <i>J</i> = 6.4 Hz 2H), 3.76 (s, 3H), 6.98-7.00 (d, <i>J</i> = 8.8 Hz, 2H), 7.42-7.45 (d, <i>J</i> = 8.8 Hz, 2H), 8.39-8.42 (d, <i>J</i> = 13.6 Hz, 1H), 12.71-12.74 (d, <i>J</i> = 13.6 Hz, 1H). |                                                                                       |
| <b><sup>13</sup>C-NMR (100 MHz, DMSO-d<sub>6</sub>, Me<sub>4</sub>Si) (ppm): δ</b> | 19.7, 37.6, 37.9, 55.3, 109.6, 115.4, 132.2, 150.9, 158.1, 195.7, 199.6.                                                                                                                                                                                                                    |                                                                                       |
| <b>GC-MS</b>                                                                       | Calculated                                                                                                                                                                                                                                                                                  | Found                                                                                 |

|  |          |          |
|--|----------|----------|
|  | 245.1052 | 245.2268 |
|--|----------|----------|

| 8   2-(((2-chlorophenyl)amino)methylene)cyclohexane-1,3-dione                      |                                                                                                                                                                                                                                                                                                                                                   |                  |
|------------------------------------------------------------------------------------|---------------------------------------------------------------------------------------------------------------------------------------------------------------------------------------------------------------------------------------------------------------------------------------------------------------------------------------------------|------------------|
| <b>Molecular Formula</b>                                                           | C <sub>13</sub> H <sub>12</sub> ClNO <sub>2</sub>                                                                                                                                                                                                                                                                                                 |                  |
| <b>Molecular Weight (g/mol)</b>                                                    | 249.0557                                                                                                                                                                                                                                                                                                                                          |                  |
| <b>Colour</b>                                                                      | Brown solid                                                                                                                                                                                                                                                                                                                                       |                  |
| <b>Melting point (°C)</b>                                                          | 141-142                                                                                                                                                                                                                                                                                                                                           |                  |
| <b>FT-IR, v/cm<sup>-1</sup></b>                                                    | 3420-3299 (NH); 3066 (CH aromatic); 2952 (CH <sub>2</sub> ), 1665,1664 (2C=O); 1587 (C=C); 1487 (C-C stretch in aromatic ring); 720 (C-Cl).                                                                                                                                                                                                       |                  |
| <b><sup>1</sup>H-NMR (400 MHz, DMSO-d<sub>6</sub>, Me<sub>4</sub>Si) (ppm): δ</b>  | 1.90-1.96 (qu, <i>J</i> = 6.8 Hz, 2H), 2.44-2.47 (t, <i>J</i> = 6.4 Hz, 2H), 2.53-2.57 (t, <i>J</i> = 6 Hz, 2H), 7.27-7.29 (t, <i>J</i> = 8 Hz, 1H), 7.42-7.46 (t, <i>J</i> = 8 Hz, 1H), 7.59-7.61 (dd, <i>J</i> = 8 Hz, 1H), 7.84-7.86 (dd, <i>J</i> = 8 Hz, 1H), 8.59-8.62 (d, <i>J</i> = 13.2 Hz, 1H), 13.19-13.22 (d, <i>J</i> = 13.2 Hz 1H). |                  |
| <b><sup>13</sup>C-NMR (100 MHz, DMSO-d<sub>6</sub>, Me<sub>4</sub>Si) (ppm): δ</b> | 19.4, 37.7, 38.0, 111.1, 118.3, 123.5, 127.4, 129.3, 130.4, 135.8, 150.2, 195.9, 201.0.                                                                                                                                                                                                                                                           |                  |
| <b>GC-MS</b>                                                                       | Calculated<br>249.0557                                                                                                                                                                                                                                                                                                                            | Found<br>249.191 |

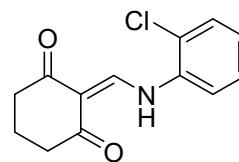

| 9   2-(((3-chlorophenyl)amino)methylene)cyclohexane-1,3-dione                     |                                                                                                                                                                                                                                              |  |
|-----------------------------------------------------------------------------------|----------------------------------------------------------------------------------------------------------------------------------------------------------------------------------------------------------------------------------------------|--|
| <b>Molecular Formula</b>                                                          | C <sub>13</sub> H <sub>12</sub> ClNO <sub>2</sub>                                                                                                                                                                                            |  |
| <b>Molecular Weight (g/mol)</b>                                                   | 249.0557                                                                                                                                                                                                                                     |  |
| <b>Colour</b>                                                                     | Brown Crystal                                                                                                                                                                                                                                |  |
| <b>Melting point (°C)</b>                                                         | 73-74                                                                                                                                                                                                                                        |  |
| <b>FT-IR, v/cm<sup>-1</sup></b>                                                   | 3487-3316 (N-H); 3167 (C-H aromatic); 2935 (CH <sub>2</sub> ), 1670,1668 (2C=O); 1568 (C=C); 1417 (C-C stretch in aromatic ring); 723 (C-Cl).                                                                                                |  |
| <b><sup>1</sup>H-NMR (400 MHz, DMSO-d<sub>6</sub>, Me<sub>4</sub>Si) (ppm): δ</b> | 1.87-1.94 (qu, <i>J</i> = 6.8 Hz, 2H), 2.42-2.45 (t, <i>J</i> = 6.4 Hz, 2H), 2.49-2.52 (t, <i>J</i> = 6 Hz, 2H), 7.28-7.30 (d, <i>J</i> = 7.2 Hz, 1H), 7.41-7.47 (m, <i>J</i> = 8.4 Hz, 2H), 7.69 (s, 1H), 8.46-8.49 (d, <i>J</i> = 13.6 Hz, |  |

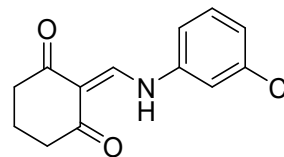

|                                                                                                                        |                                                                                         |         |
|------------------------------------------------------------------------------------------------------------------------|-----------------------------------------------------------------------------------------|---------|
|                                                                                                                        | 1H), 12.57-12.60 (d, $J= 13.6$ Hz, 1H).                                                 |         |
| <b><math>^{13}\text{C}</math>-NMR (100 MHz, DMSO-<math>d_6</math>, Me<math>_4</math>Si) (ppm): <math>\delta</math></b> | 19.5, 37.7, 38.1, 110.6, 117.8, 119.1, 126.1, 131.7, 134.6, 140.7, 150.9, 195.9, 200.1. |         |
| <b>GC-MS</b>                                                                                                           | Calculated                                                                              | Found   |
|                                                                                                                        | 249.0557                                                                                | 249.191 |

|                                                                                                                        |                                                                                                                                                                                                                                    |                                                                                     |
|------------------------------------------------------------------------------------------------------------------------|------------------------------------------------------------------------------------------------------------------------------------------------------------------------------------------------------------------------------------|-------------------------------------------------------------------------------------|
| <b>10</b>                                                                                                              | <b>2-(((4-chlorophenyl)amino)methylene)cyclohexane-1,3-dione</b>                                                                                                                                                                   |                                                                                     |
| <b>Molecular Formula</b>                                                                                               | $\text{C}_{13}\text{H}_{12}\text{ClNO}_2$                                                                                                                                                                                          | 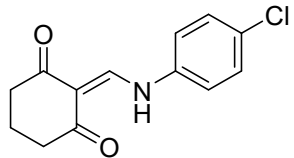 |
| <b>Molecular Weight (g/mol)</b>                                                                                        | 249.0557                                                                                                                                                                                                                           |                                                                                     |
| <b>Colour</b>                                                                                                          | Brown crystal                                                                                                                                                                                                                      |                                                                                     |
| <b>Melting point (<math>^{\circ}\text{C}</math>)</b>                                                                   | 156-157                                                                                                                                                                                                                            |                                                                                     |
| <b>FT-IR, <math>\nu/\text{cm}^{-1}</math></b>                                                                          | 3449-3235 (NH); 3073 (CH aromatic); 2945 ( $\text{CH}_2$ ), 1663,1661 ( $2\text{C}=\text{O}$ ); 1570 ( $\text{C}=\text{C}$ ); 1496 (C-C stretch in aromatic ring); 740 (C-Cl).                                                     |                                                                                     |
| <b><math>^1\text{H}</math>-NMR (400 MHz, DMSO-<math>d_6</math>, Me<math>_4</math>Si) (ppm): <math>\delta</math></b>    | 1.87-1.94 (qu, $J= 6.4$ Hz, 2H), 2.41-2.44 (t, $J= 6.8$ Hz, 2H), 2.49-2.50 (t, $J= 6$ Hz, 2H), 7.46-7.48 (d, $J= 8.8$ Hz, 2H), 7.53-7.55 (d, $J= 8.8$ Hz, 2H), 8.44-8.47 (d, $J= 13.6$ Hz, 1H), 12.60-12.63 (d, $J= 13.6$ Hz, 1H). |                                                                                     |
| <b><math>^{13}\text{C}</math>-NMR (100 MHz, DMSO-<math>d_6</math>, Me<math>_4</math>Si) (ppm): <math>\delta</math></b> | 19.5, 37.7, 38.0, 110.4, 120.9, 130.0, 130.5, 138.2, 150.8, 195.9, 200.0.                                                                                                                                                          |                                                                                     |
| <b>GC-MS</b>                                                                                                           | Calculated                                                                                                                                                                                                                         | Found                                                                               |
|                                                                                                                        | 249.0557                                                                                                                                                                                                                           | 249.1908                                                                            |

|                                                      |                                                                 |                                                                                       |
|------------------------------------------------------|-----------------------------------------------------------------|---------------------------------------------------------------------------------------|
| <b>11</b>                                            | <b>2-(((2-bromophenyl)amino)methylene)cyclohexane-1,3-dione</b> |                                                                                       |
| <b>Molecular Formula</b>                             | $\text{C}_{13}\text{H}_{12}\text{BrNO}_2$                       | 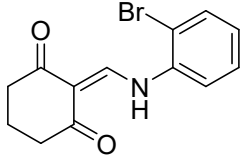 |
| <b>Molecular Weight (g/mol)</b>                      | 293.0051                                                        |                                                                                       |
| <b>Colour</b>                                        | Brown Crystal                                                   |                                                                                       |
| <b>Melting point (<math>^{\circ}\text{C}</math>)</b> | 166-167                                                         |                                                                                       |

|                                                                                                      |                                                                                                                                                                                                                                                                                                    |                   |
|------------------------------------------------------------------------------------------------------|----------------------------------------------------------------------------------------------------------------------------------------------------------------------------------------------------------------------------------------------------------------------------------------------------|-------------------|
| <b>FT-IR, <math>\nu/\text{cm}^{-1}</math></b>                                                        | 3455-3202 (NH); 3074 (CH aromatic); 2941 (CH <sub>2</sub> ), 1668,1666 (2C=O); 1588 (C=C); 1403 (C-C stretch in aromatic ring); 669 (C-Br).                                                                                                                                                        |                   |
| <b><sup>1</sup>H-NMR (400 MHz, DMSO-d<sub>6</sub>, Me<sub>4</sub>Si) (ppm): <math>\delta</math></b>  | 1.90- 1.96 (qu, $J= 6.4$ Hz, 2H), 2.44-2.47 (t, $J= 6.4$ Hz, 2H), 2.53-2.55 (t, $J= 6.4$ Hz, 2H), 7.18-7.21 (t, $J= 8$ Hz, 1H), 7.46-7.50 (t, $J= 8$ Hz, 1H), 7.73-7.75 (dd, $J= 8.4$ Hz, 1H), 7.79-7.81 (d, $J= 8.4$ Hz, 1H), 8.56-8.59 (d, $J= 13.2$ Hz, 1H), 13.11-13.14 (d, $J= 12.8$ Hz, 1H). |                   |
| <b><sup>13</sup>C-NMR (100 MHz, DMSO-d<sub>6</sub>, Me<sub>4</sub>Si) (ppm): <math>\delta</math></b> | 19.4, 37.7, 38.0, 111.0, 113.9, 118.6, 127.8, 129.8, 133.7, 137.2, 150.3, 195.9, 200.8.                                                                                                                                                                                                            |                   |
| <b>HR-MS ((ESI +ve) <math>m/z</math> [M+H]<sup>+</sup>)</b>                                          | Calculated<br>293.0051                                                                                                                                                                                                                                                                             | Found<br>294.0133 |

|                                                                                                      |                                                                                                                                                                                                                                    |                                                                                      |
|------------------------------------------------------------------------------------------------------|------------------------------------------------------------------------------------------------------------------------------------------------------------------------------------------------------------------------------------|--------------------------------------------------------------------------------------|
| <b>12</b>                                                                                            | <b>2-(((4-bromophenyl)amino)methylene)cyclohexane-1,3-dione</b>                                                                                                                                                                    |                                                                                      |
| <b>Molecular Formula</b>                                                                             | C <sub>13</sub> H <sub>12</sub> BrNO <sub>2</sub>                                                                                                                                                                                  | 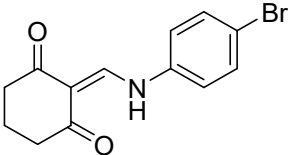 |
| <b>Molecular Weight (g/mol)</b>                                                                      | 293.0051                                                                                                                                                                                                                           |                                                                                      |
| <b>Colour</b>                                                                                        | Yellow solid                                                                                                                                                                                                                       |                                                                                      |
| <b>Melting point (°C)</b>                                                                            | 172-173                                                                                                                                                                                                                            |                                                                                      |
| <b>FT-IR, <math>\nu/\text{cm}^{-1}</math></b>                                                        | 3422-3377 (NH); 3074 (CH aromatic); 2944 (CH <sub>2</sub> ), 1658,1656 (2C=O); 1562 (C=C); 1501 (C-C stretch in aromatic ring); 658 (C-Br).                                                                                        |                                                                                      |
| <b><sup>1</sup>H-NMR (400 MHz, DMSO-d<sub>6</sub>, Me<sub>4</sub>Si) (ppm): <math>\delta</math></b>  | 1.87-1.94 (qu, $J= 6.8$ Hz, 2H), 2.41-2.44 (t, $J= 6$ Hz, 2H), 2.50-2.51 (t, $J= 6.4$ Hz, 2H), 7.46-7.49 (d, $J= 8.8$ Hz, 2H), 7.59-7.61 (d, $J= 8.8$ Hz, 2H), 8.44-8.47 (d, $J= 13.6$ Hz, 1H), 12.58-12.62 (d, $J= 13.6$ Hz, 1H). |                                                                                      |
| <b><sup>13</sup>C-NMR (100 MHz, DMSO-d<sub>6</sub>, Me<sub>4</sub>Si) (ppm): <math>\delta</math></b> | 19.5, 37.7, 38.0, 110.4, 118.6, 121.2, 132.9, 138.6, 150.7, 195.9, 200.1.                                                                                                                                                          |                                                                                      |
| <b>HR-MS ((ESI +ve) <math>m/z</math> [M+H]<sup>+</sup>)</b>                                          | Calculated<br>293.0051                                                                                                                                                                                                             | Found<br>294.0141                                                                    |

|           |                                                                  |  |
|-----------|------------------------------------------------------------------|--|
| <b>13</b> | <b>2-(((2-fluorophenyl)amino)methylene)cyclohexane-1,3-dione</b> |  |
|-----------|------------------------------------------------------------------|--|



|                                                                                    |                                                                                                                                                                                                                                                            |                                                                                     |
|------------------------------------------------------------------------------------|------------------------------------------------------------------------------------------------------------------------------------------------------------------------------------------------------------------------------------------------------------|-------------------------------------------------------------------------------------|
| <b>Molecular Formula</b>                                                           | C <sub>13</sub> H <sub>12</sub> FNO <sub>2</sub>                                                                                                                                                                                                           | 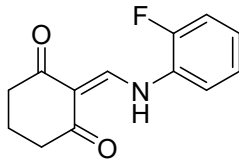 |
| <b>Molecular Weight (g/mol)</b>                                                    | 233.0852                                                                                                                                                                                                                                                   |                                                                                     |
| <b>Colour</b>                                                                      | Yellow solid                                                                                                                                                                                                                                               |                                                                                     |
| <b>Melting point (°C)</b>                                                          | 115-117                                                                                                                                                                                                                                                    |                                                                                     |
| <b>FT-IR, v/cm<sup>-1</sup></b>                                                    | 3470-3334 (NH); 3062 (CH aromatic); 2946 (CH <sub>2</sub> ), 1667 (2C=O); 1574 (C=C); 1506 (C-C stretch in aromatic ring); 1323 (C-F).                                                                                                                     |                                                                                     |
| <b><sup>1</sup>H-NMR (400 MHz, DMSO-d<sub>6</sub>, Me<sub>4</sub>Si) (ppm): δ</b>  | 1.89- 1.95 (qu, <i>J</i> = 6.4 Hz, 2H), 2.43-2.46 (t, <i>J</i> = 6 Hz, 2H), 2.52-2.53 (t, <i>J</i> = 6.4 Hz, 2H), 7.26-7.29 (m, 2H), 7.37-7.40 (m, 1H), 7.79-7.83 (m, 1H), 8.56-8.59 (d, <i>J</i> = 13.2 Hz, 1H), 12.98-13.02 (d, <i>J</i> = 13.2 Hz, 1H). |                                                                                     |
| <b><sup>13</sup>C-NMR (100 MHz, DMSO-d<sub>6</sub>, Me<sub>4</sub>Si) (ppm): δ</b> | 19.5, 37.7, 38.0, 110.9, 116.5, 116.7, 119.0, 126.1, 127.1, 127.2, 127.4, 150.9, 151.8, 154.3, 195.9, 201.0.                                                                                                                                               |                                                                                     |
| <b>HR-MS ((ESI +ve) <i>m/z</i> [M+H]<sup>+</sup>)</b>                              | Calculated<br>233.0852                                                                                                                                                                                                                                     | Found<br>234.0933                                                                   |

|                                                                                    |                                                                                                                                                                                                                                                                                                                       |                                                                                       |
|------------------------------------------------------------------------------------|-----------------------------------------------------------------------------------------------------------------------------------------------------------------------------------------------------------------------------------------------------------------------------------------------------------------------|---------------------------------------------------------------------------------------|
| <b>14</b>                                                                          | <b>2-(((3-fluorophenyl)amino)methylene)cyclohexane-1,3-dione</b>                                                                                                                                                                                                                                                      |                                                                                       |
| <b>Molecular Formula</b>                                                           | C <sub>13</sub> H <sub>12</sub> FNO <sub>2</sub>                                                                                                                                                                                                                                                                      | 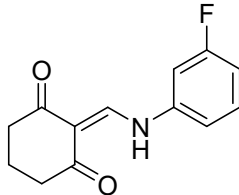 |
| <b>Molecular Weight (g/mol)</b>                                                    | 233.0852                                                                                                                                                                                                                                                                                                              |                                                                                       |
| <b>Colour</b>                                                                      | Yellow solid                                                                                                                                                                                                                                                                                                          |                                                                                       |
| <b>Melting point (°C)</b>                                                          | 125-126                                                                                                                                                                                                                                                                                                               |                                                                                       |
| <b>FT-IR, v/cm<sup>-1</sup></b>                                                    | 3428-3295 (NH); 3046 (CH aromatic); 2960 (CH <sub>2</sub> ), 1661 (2C=O); 1570 (C=C); 1455 (C-C stretch in aromatic ring); 1323 (C-F).                                                                                                                                                                                |                                                                                       |
| <b><sup>1</sup>H-NMR (400 MHz, DMSO-d<sub>6</sub>, Me<sub>4</sub>Si) (ppm): δ</b>  | 1.88- 1.94 (qu, <i>J</i> = 6.4 Hz, 2H), 2.42-2.45 (t, <i>J</i> = 6.4 Hz, 2H), 2.50-2.51 (t, <i>J</i> = 6.4 Hz, 2H), 7.05-7.09 (dt, <i>J</i> = 8.4 Hz, 1H), 7.31-7.33 (dd, <i>J</i> = 8 Hz, 1H), 7.42-7.46 (m, 1H), 7.48-7.50 (m, 1H), 8.47-8.50 (d, <i>J</i> = 13.6 Hz, 1H), 12.60-13.64 (d, <i>J</i> = 13.6 Hz, 1H). |                                                                                       |
| <b><sup>13</sup>C-NMR (100 MHz, DMSO-d<sub>6</sub>, Me<sub>4</sub>Si) (ppm): δ</b> | 19.5, 37.7, 38.1, 106.4, 106.6, 110.5, 112.9, 113.1, 115.1, 131.8, 131.9, 140.9, 141.0, 150.9, 162.0, 164.4, 196.0, 200.2.                                                                                                                                                                                            |                                                                                       |

|                                                       |                        |                   |
|-------------------------------------------------------|------------------------|-------------------|
| <b>HR-MS ((ESI +ve) <i>m/z</i> [M+H]<sup>+</sup>)</b> | Calculated<br>233.0852 | Found<br>234.0929 |
|-------------------------------------------------------|------------------------|-------------------|

|                                                                                    |                                                                                                                                                                                                                                                            |                                                                                     |
|------------------------------------------------------------------------------------|------------------------------------------------------------------------------------------------------------------------------------------------------------------------------------------------------------------------------------------------------------|-------------------------------------------------------------------------------------|
| <b>15</b>                                                                          | <b>2-(((4-fluorophenyl)amino)methylene)cyclohexane-1,3-dione</b>                                                                                                                                                                                           |                                                                                     |
| <b>Molecular Formula</b>                                                           | C <sub>13</sub> H <sub>12</sub> FNO <sub>2</sub>                                                                                                                                                                                                           | 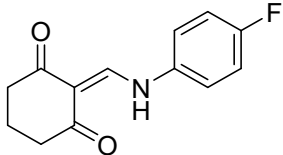 |
| <b>Molecular Weight (g/mol)</b>                                                    | 233.0852                                                                                                                                                                                                                                                   |                                                                                     |
| <b>Colour</b>                                                                      | Brown solid                                                                                                                                                                                                                                                |                                                                                     |
| <b>Melting point (°C)</b>                                                          | 133-134                                                                                                                                                                                                                                                    |                                                                                     |
| <b>FT-IR, v/cm<sup>-1</sup></b>                                                    | 3487-3338 (NH); 3076 (CH aromatic); 2952 (CH <sub>2</sub> ), 1668,1666 (2C=O); 1590 (C=C); 1511 (C-C stretch in aromatic ring); 1323 (C-F).                                                                                                                |                                                                                     |
| <b><sup>1</sup>H-NMR (400 MHz, DMSO-d<sub>6</sub>, Me<sub>4</sub>Si) (ppm): δ</b>  | 1.87- 1.93 (qu, <i>J</i> = 6.8 Hz, 2H), 2.41-2.44 (t, <i>J</i> = 6 Hz, 2H), 2.50-2.51 (t, <i>J</i> = 6.4 Hz, 2H), 7.25-7.29 (t, <i>J</i> = 8.8 Hz, 2H), 7.54-7.57 (m, 2H), 8.41-8.44 (d, <i>J</i> = 13.6 Hz, 1H), 12.64-12.67 (d, <i>J</i> = 13.6 Hz, 1H). |                                                                                     |
| <b><sup>13</sup>C-NMR (100 MHz, DMSO-d<sub>6</sub>, Me<sub>4</sub>Si) (ppm): δ</b> | 19.6, 37.6, 38.0, 110.1, 116.8, 117.0, 121.2, 121.3, 135.7, 151.4, 159.3, 161.7,195.9, 199.9.                                                                                                                                                              |                                                                                     |
| <b>HR-MS ((ESI +ve) <i>m/z</i> [M+H]<sup>+</sup>)</b>                              | Calculated<br>233.0852                                                                                                                                                                                                                                     | Found<br>234.0938                                                                   |

|                                                                                   |                                                                                                                                                                                                                                                                                                                                      |                                                                                       |
|-----------------------------------------------------------------------------------|--------------------------------------------------------------------------------------------------------------------------------------------------------------------------------------------------------------------------------------------------------------------------------------------------------------------------------------|---------------------------------------------------------------------------------------|
| <b>16</b>                                                                         | <b>2-((pyridin-2-ylamino)methylene)cyclohexane-1,3-dione</b>                                                                                                                                                                                                                                                                         |                                                                                       |
| <b>Molecular Formula</b>                                                          | C <sub>12</sub> H <sub>12</sub> N <sub>2</sub> O <sub>2</sub>                                                                                                                                                                                                                                                                        | 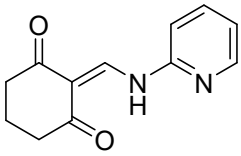 |
| <b>Molecular Weight (g/mol)</b>                                                   | 216.0899                                                                                                                                                                                                                                                                                                                             |                                                                                       |
| <b>Colour</b>                                                                     | Yellow solid                                                                                                                                                                                                                                                                                                                         |                                                                                       |
| <b>Melting point (°C)</b>                                                         | 104-106                                                                                                                                                                                                                                                                                                                              |                                                                                       |
| <b>FT-IR, v/cm<sup>-1</sup></b>                                                   | 3479-3356 (NH); 3176 (CH aromatic); 2946 (CH <sub>2</sub> ), 1664,1662 (2C=O); 1594 (C=C); 1540 (C-C stretch in aromatic ring).                                                                                                                                                                                                      |                                                                                       |
| <b><sup>1</sup>H-NMR (400 MHz, DMSO-d<sub>6</sub>, Me<sub>4</sub>Si) (ppm): δ</b> | 1.89- 1.95 (qu, <i>J</i> = 6.4 Hz, 2H), 2.44-2.49 (t, <i>J</i> = 6.4 Hz, 2H), 2.50-2.51 (t, <i>J</i> = 6.4 Hz, 2H), 7.26-7.28 (m, 1H), 7.52-7.54 (d, <i>J</i> = 8 Hz, 1H), 7.85-7.89 (dt, <i>J</i> = 8 Hz, 1H), 8.42-8.43 (dd, <i>J</i> = 4.8 Hz, 1H), 9.05-9.08 (d, <i>J</i> = 12 Hz, 2H), 12.42-12.45 (d, <i>J</i> = 13.2 Hz, 1H). |                                                                                       |

|                                                                                    |                                                                                  |                  |
|------------------------------------------------------------------------------------|----------------------------------------------------------------------------------|------------------|
| <b><sup>13</sup>C-NMR (100 MHz, DMSO-d<sub>6</sub>, Me<sub>4</sub>Si) (ppm): δ</b> | 19.3, 37.8, 38.2, 110.9, 114.2, 121.8, 139.8, 148.1, 149.1, 150.5, 196.6, 200.4. |                  |
| <b>GC-MS</b>                                                                       | Calculated<br>216.0899                                                           | Found<br>216.225 |

|                                                                                    |                                                                                                                                                                                                                                                                               |                                                                                     |
|------------------------------------------------------------------------------------|-------------------------------------------------------------------------------------------------------------------------------------------------------------------------------------------------------------------------------------------------------------------------------|-------------------------------------------------------------------------------------|
| <b>17</b>                                                                          | <b>2-((4-iodophenyl)amino)methylene)cyclohexane-1,3-dione</b>                                                                                                                                                                                                                 |                                                                                     |
| <b>Molecular Formula</b>                                                           | C <sub>13</sub> H <sub>12</sub> INO <sub>2</sub>                                                                                                                                                                                                                              | 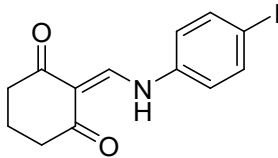 |
| <b>Molecular Weight (g/mol)</b>                                                    | 340.9913                                                                                                                                                                                                                                                                      |                                                                                     |
| <b>Colour</b>                                                                      | Brownish green solid                                                                                                                                                                                                                                                          |                                                                                     |
| <b>Melting point (°C)</b>                                                          | 153-154                                                                                                                                                                                                                                                                       |                                                                                     |
| <b>FT-IR, ν/cm<sup>-1</sup></b>                                                    | 3405-3295 (NH); 3087 (CH aromatic); 2922 (CH <sub>2</sub> ), 1668, 1666 (2C=O); 1594 (C=C); 1506 (C-C stretch in aromatic ring); 545 (C-F).                                                                                                                                   |                                                                                     |
| <b><sup>1</sup>H-NMR (400 MHz, DMSO-d<sub>6</sub>, Me<sub>4</sub>Si) (ppm): δ</b>  | 1.87- 1.93 (qu, <i>J</i> = 6.4 Hz, 2H), 2.41-2.44 (t, <i>J</i> = 6 Hz, 2H), 2.50-2.51 (t, <i>J</i> = 6.4 Hz, 2H), 7.32-7.34 (d, <i>J</i> = 8.8 Hz, 2H), 7.73-7.76 (d, <i>J</i> = 8.8 Hz, 2H), 8.44-8.47 (d, <i>J</i> = 12.4 Hz, 1H), 12.57-12.60 (d, <i>J</i> = 13.2 Hz, 1H). |                                                                                     |
| <b><sup>13</sup>C-NMR (100 MHz, DMSO-d<sub>6</sub>, Me<sub>4</sub>Si) (ppm): δ</b> | 19.5, 37.7, 38.0, 91.1, 110.4, 121.3, 138.7, 139.0, 150.5, 195.9, 200.1.                                                                                                                                                                                                      |                                                                                     |
| <b>HR-MS ((ESI +ve) <i>m/z</i> [M+H]<sup>+</sup>)</b>                              | Calculated<br>340.9913                                                                                                                                                                                                                                                        | Found<br>341.9991                                                                   |

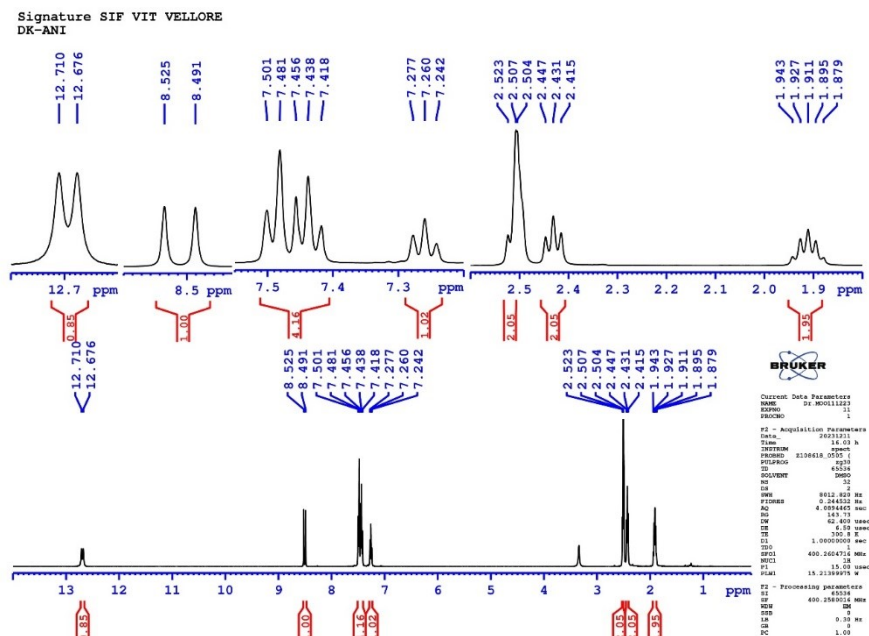

Fig. S11  $^1\text{H}$  NMR spectra of 4a

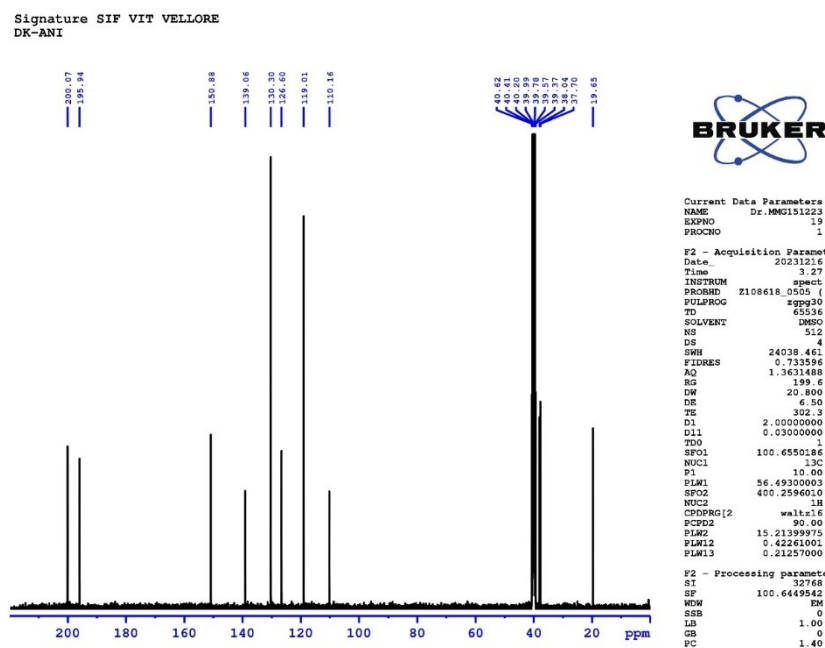

Fig. S12  $^{13}\text{C}$  NMR spectra of 4a

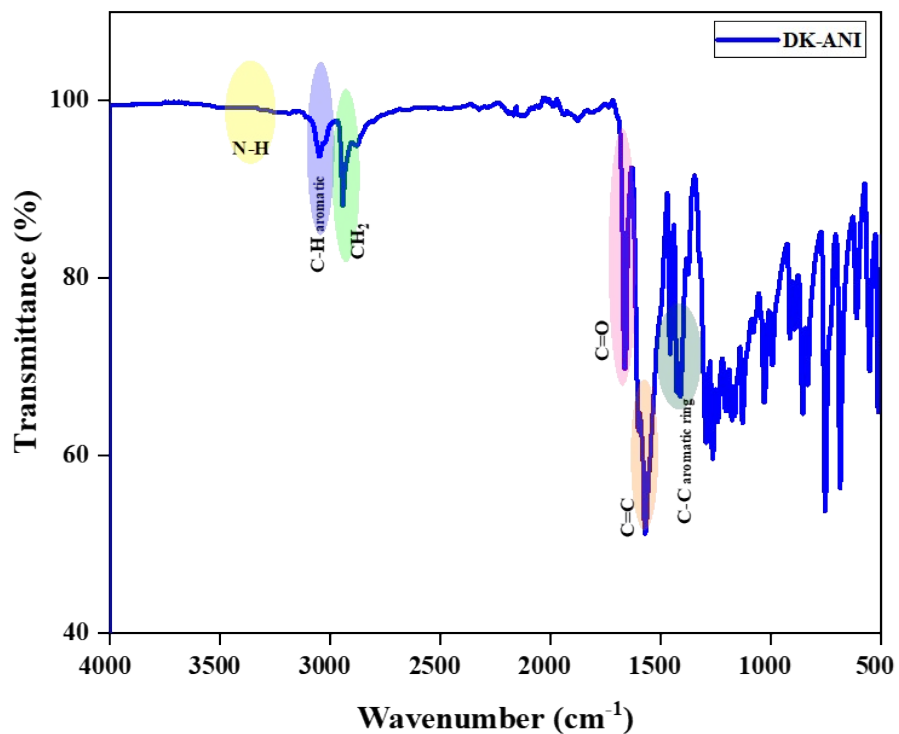

Fig. S13 FT-IR spectra of 4a

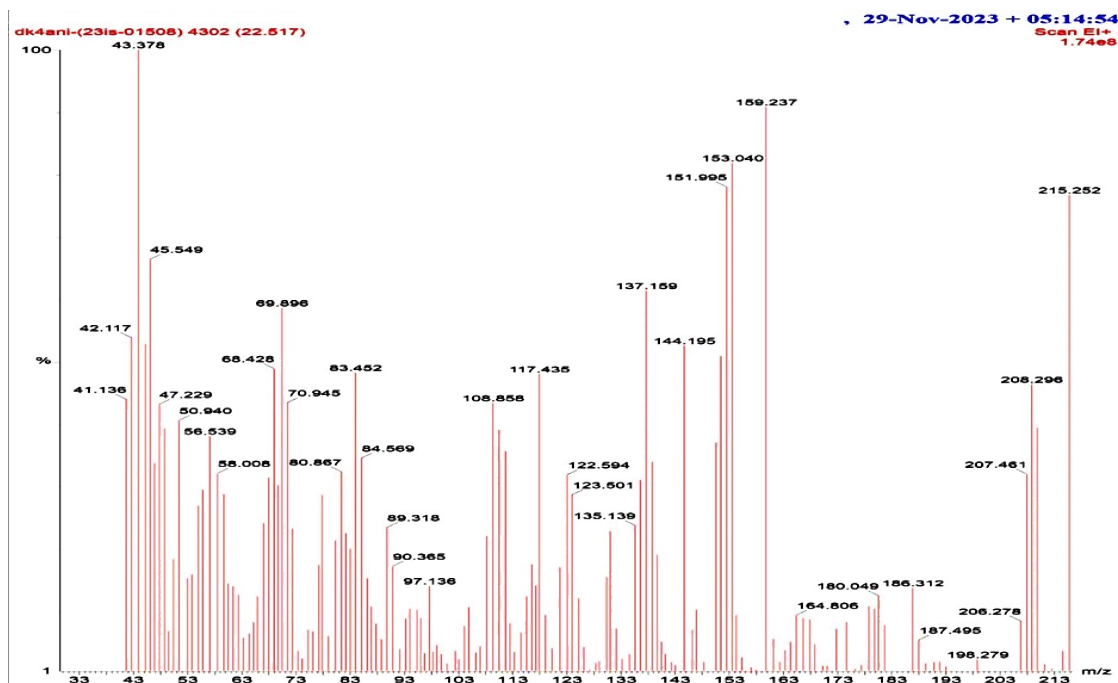

Fig. S14 GC-MS spectra of 4a

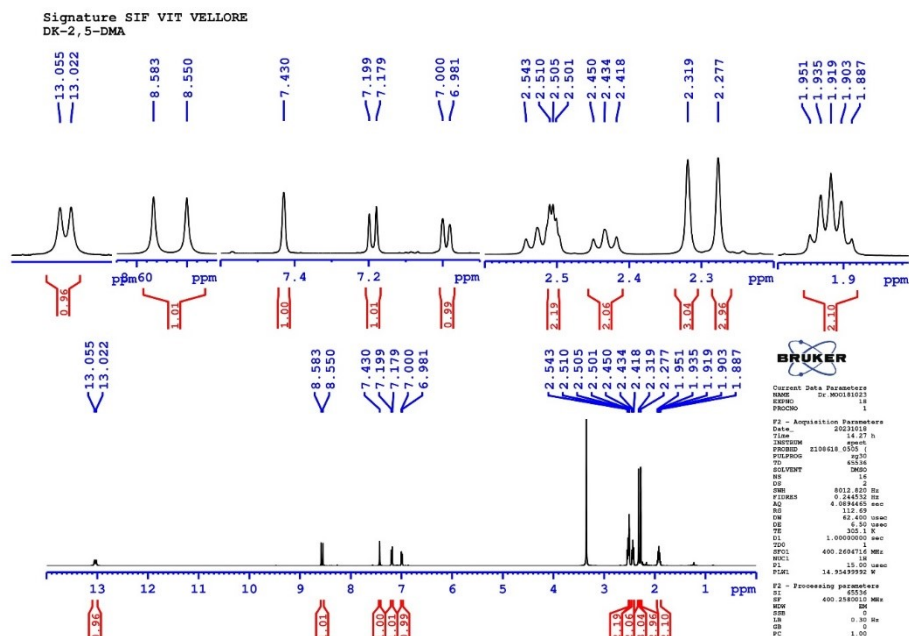

Fig. S15 <sup>1</sup>H NMR spectra of **4b**

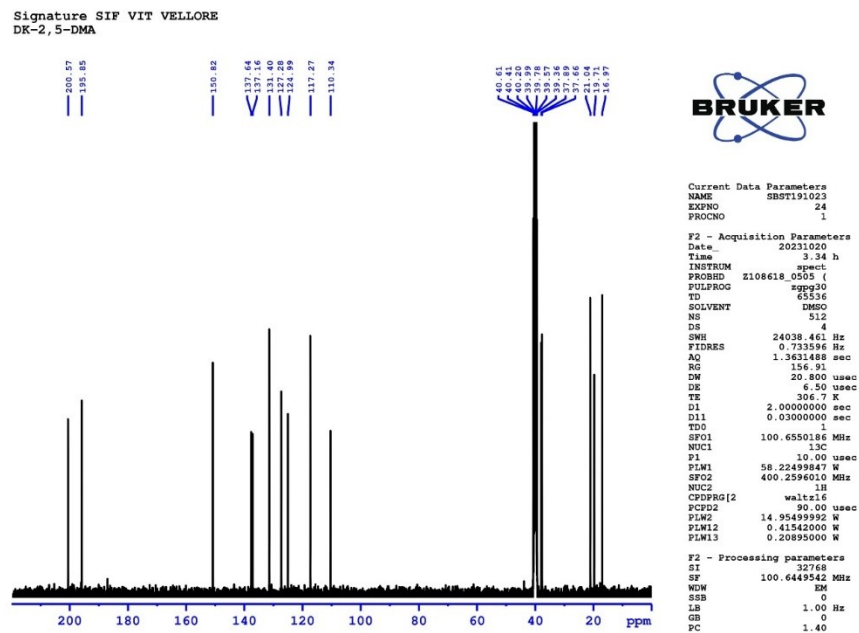

Fig. S16 <sup>13</sup>C NMR spectra of **4b**

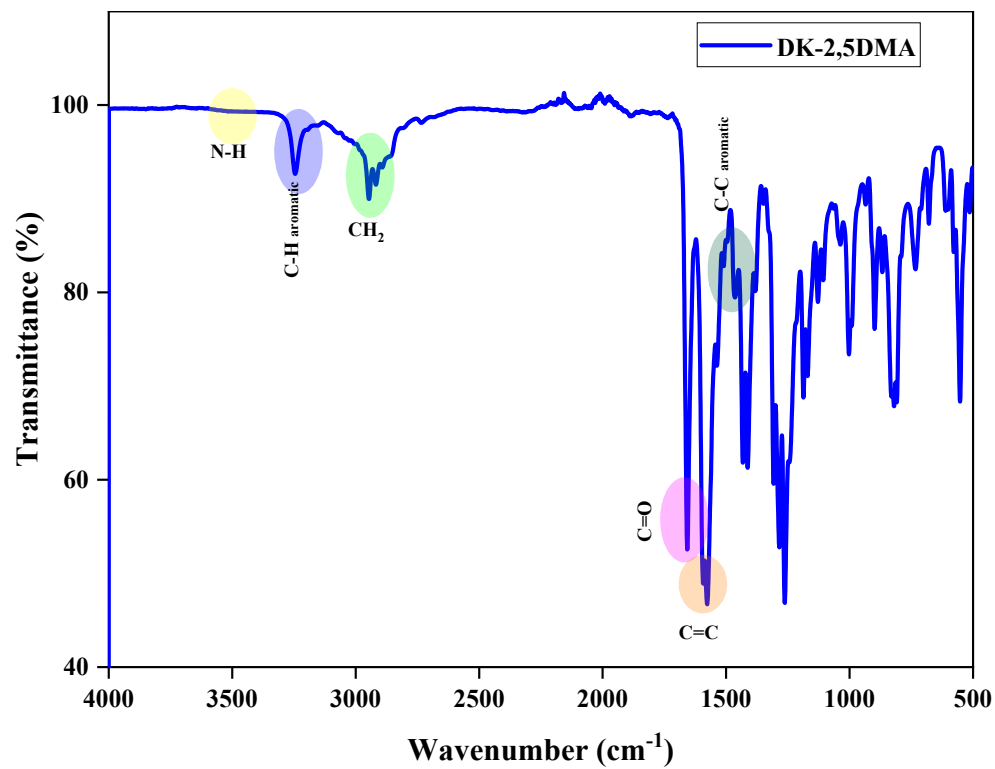

**Fig. S17** FT-IR spectra of **4b**

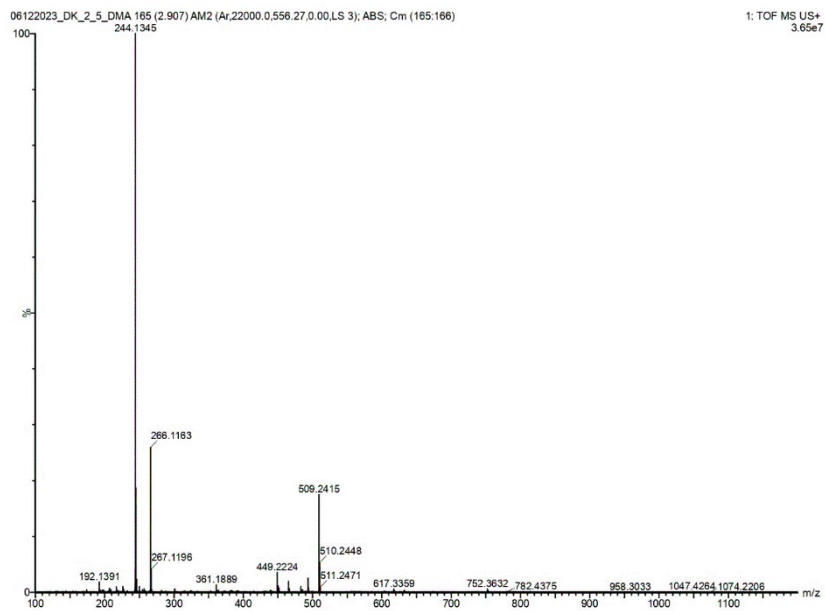

**Fig. S18** HR-MS spectra of **4b**

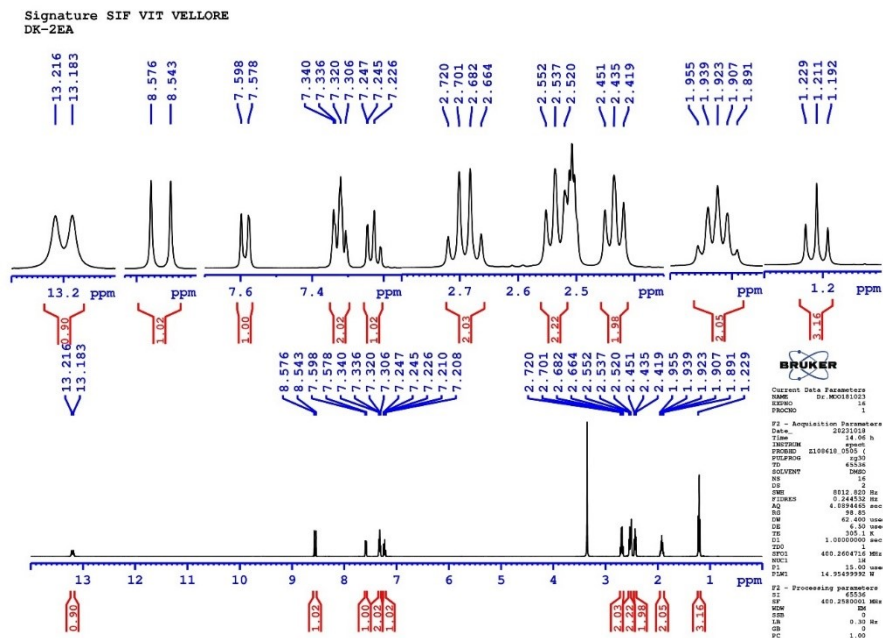

Fig. S19  $^1\text{H}$  NMR spectra of **4c**

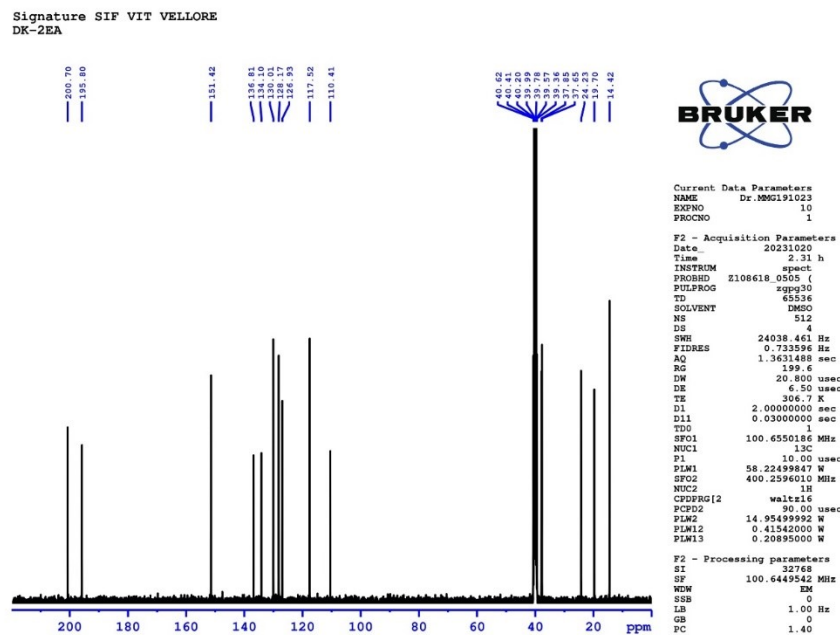

Fig. S20  $^{13}\text{C}$  NMR spectra of **4c**



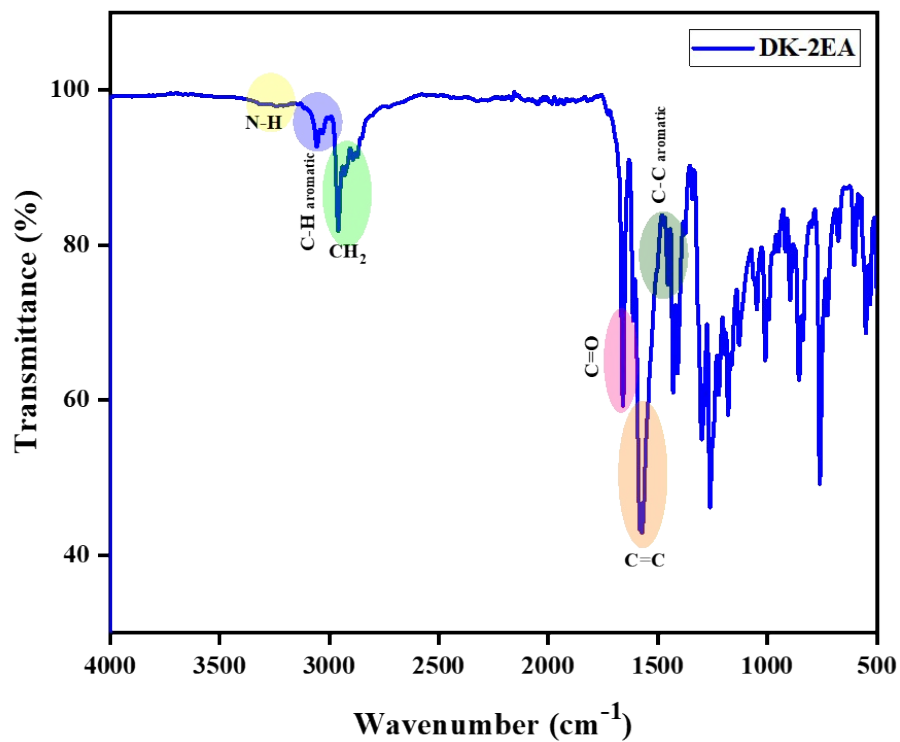

Fig. S21 FT-IR spectra of 4c

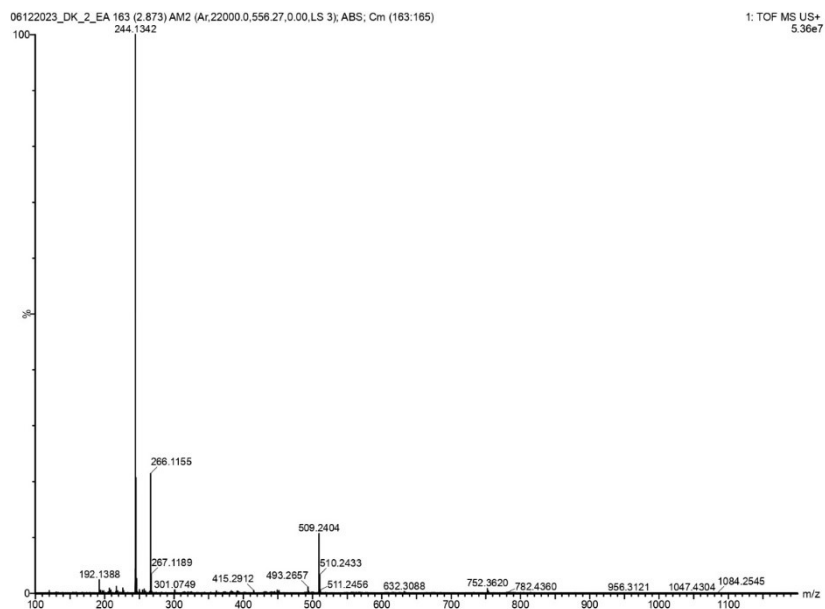

Fig. S22 HR-MS spectra of 4c

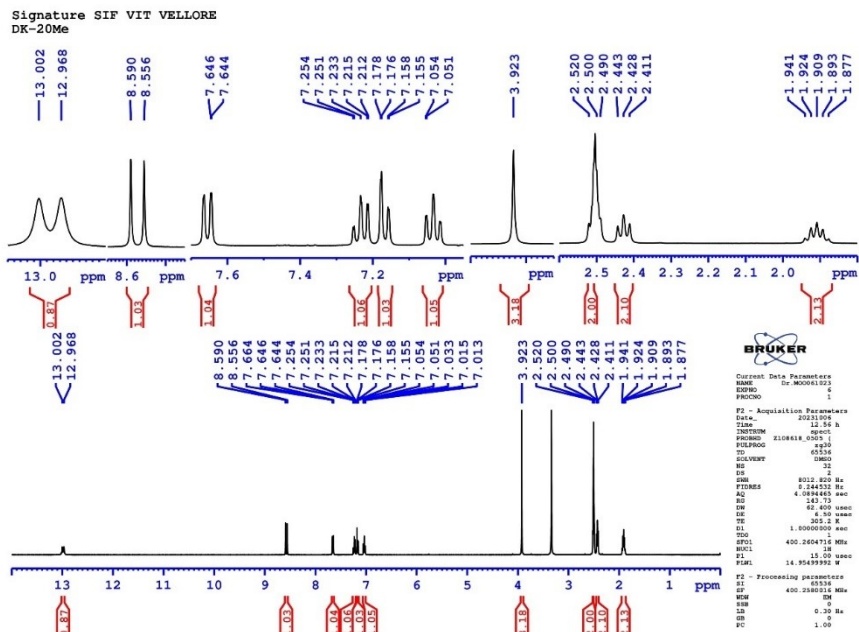

Fig. S23 <sup>1</sup>H NMR spectra of 4d

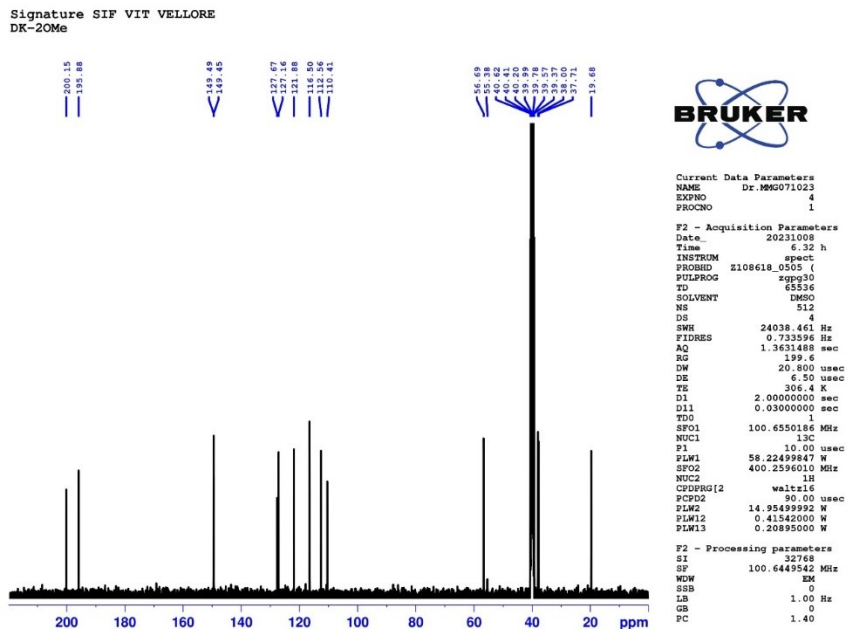

Fig. S24 <sup>13</sup>C NMR spectra of 4d

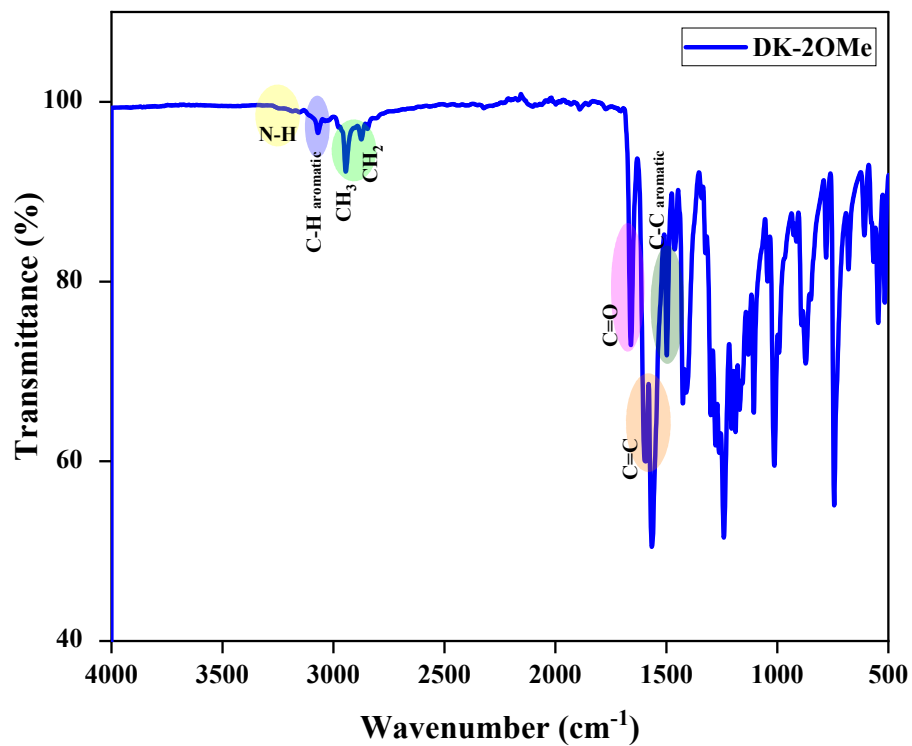

Fig. S25 FT-IR spectra of **4d**

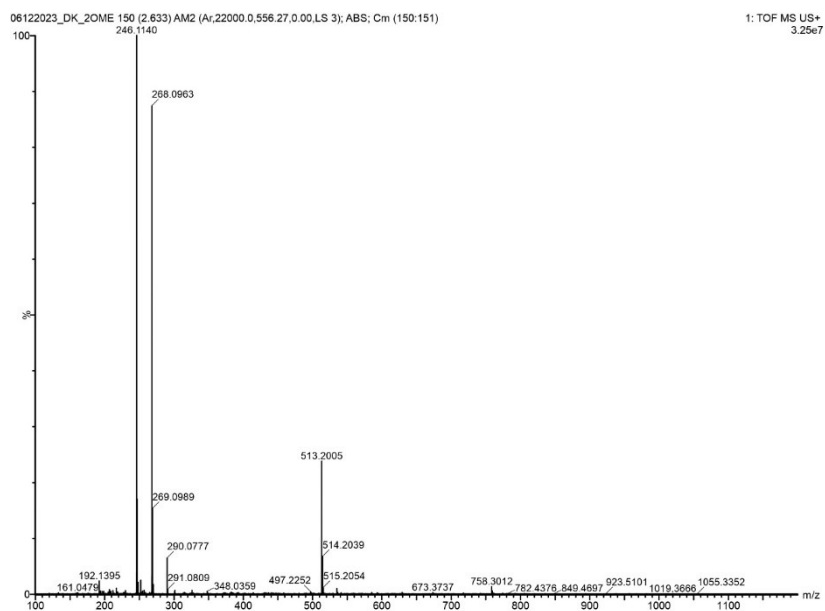

Fig. S26 HR-MS spectra of **4d**

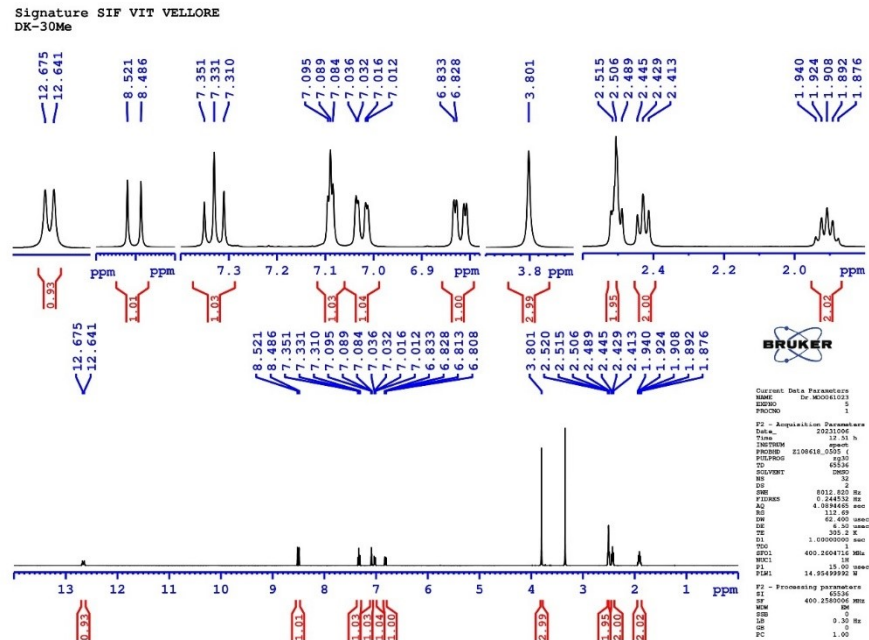

Fig. S27 <sup>1</sup>H NMR spectra of 4e

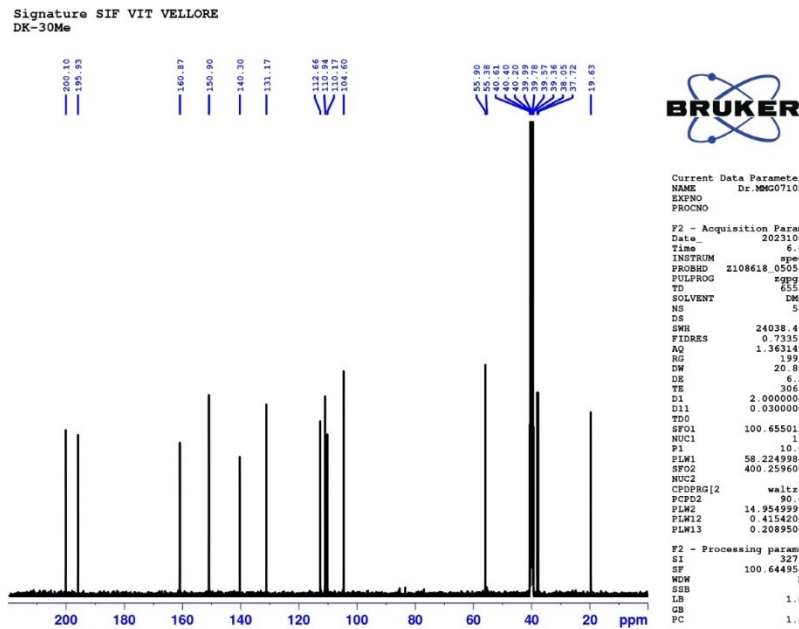

Fig. S28 <sup>13</sup>C NMR spectra of 4e

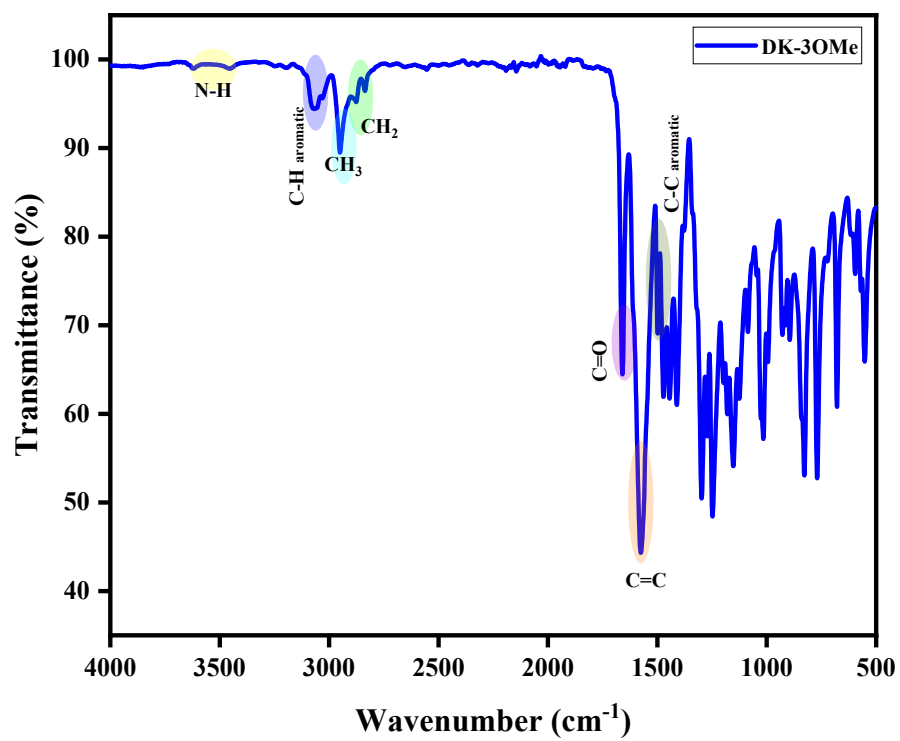

Fig. S29 FT-IR spectra of 4e

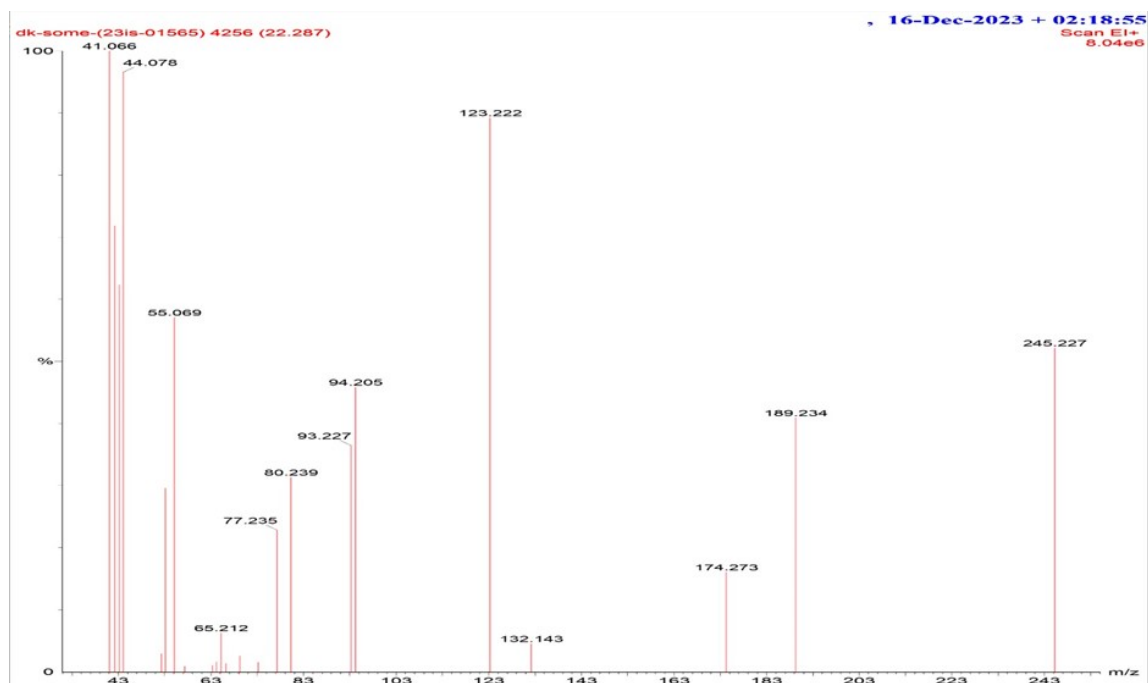

Fig. S30 GC-MS spectra of 4e

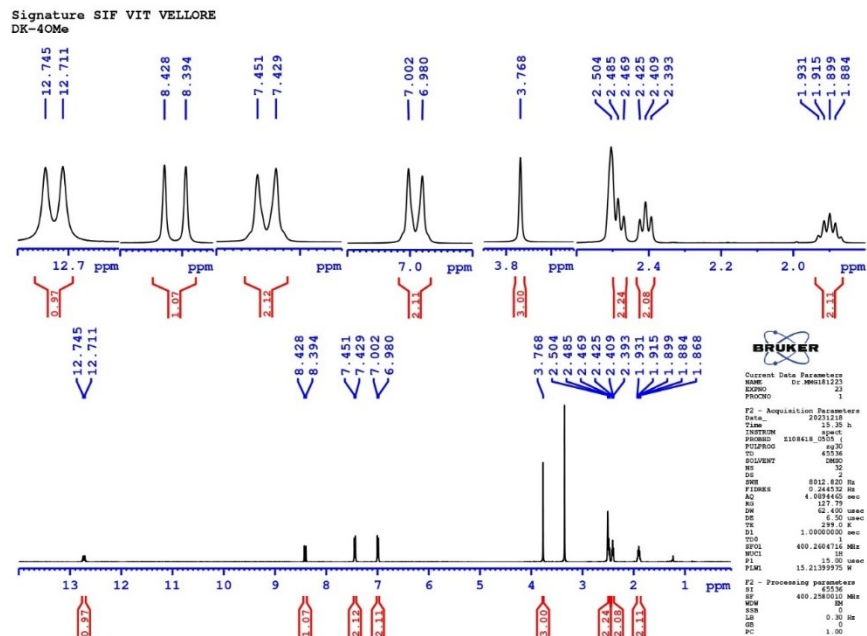

Fig. S31  $^1\text{H}$  NMR spectra of **4f**

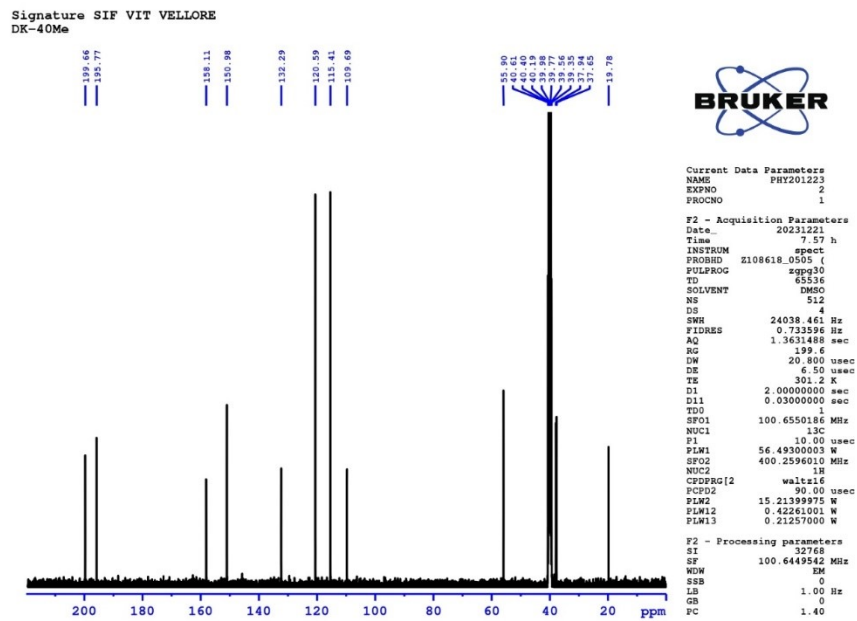

Fig. S32  $^{13}\text{C}$  NMR spectra of **4f**

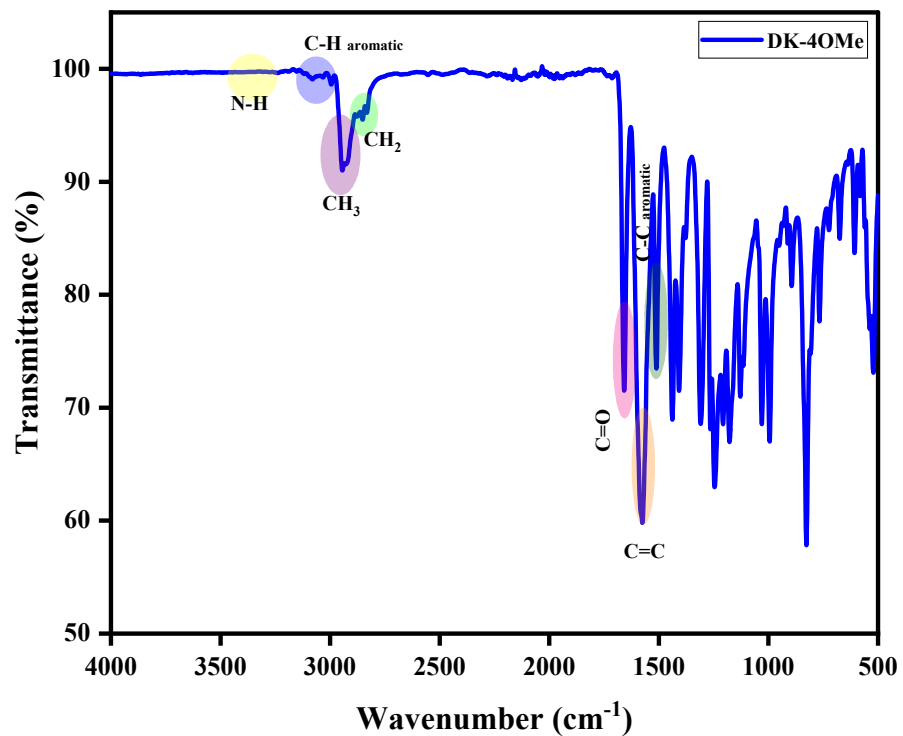

Fig. S33 FT-IR spectra of 4f

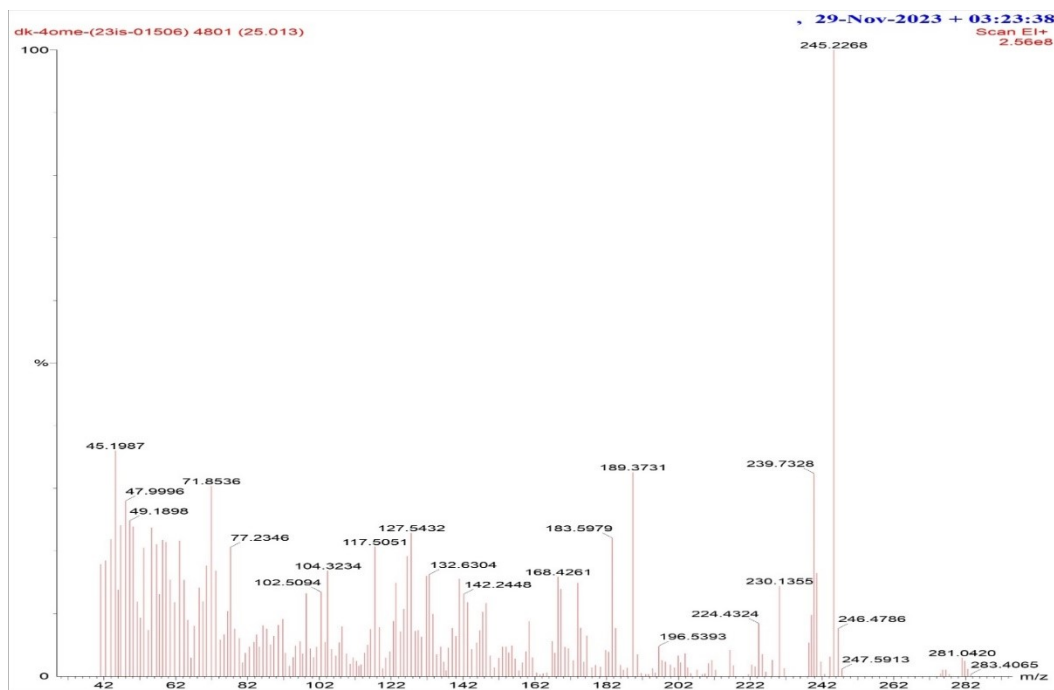

Fig. S34 GC-MS spectra of 4f

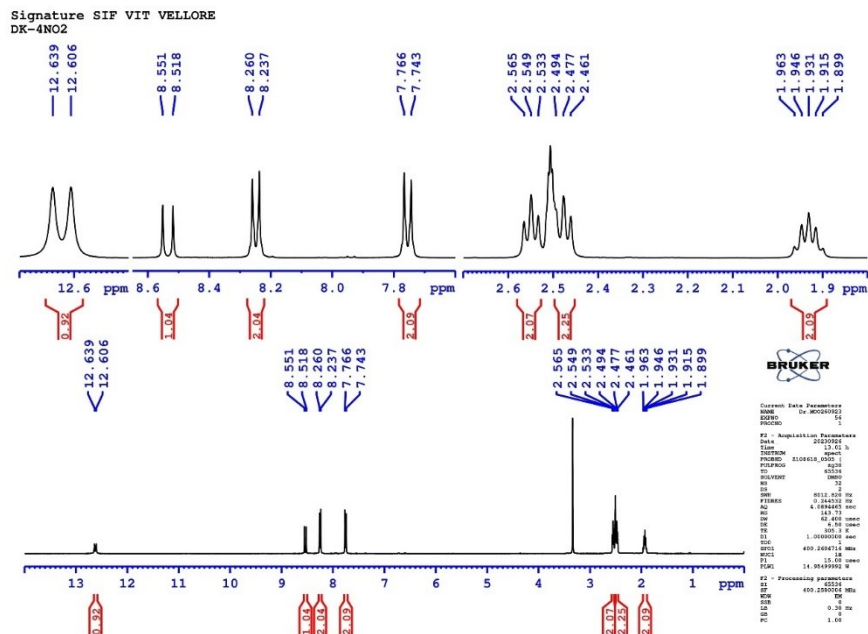

Fig. S35  $^1\text{H}$  NMR spectra of 4g

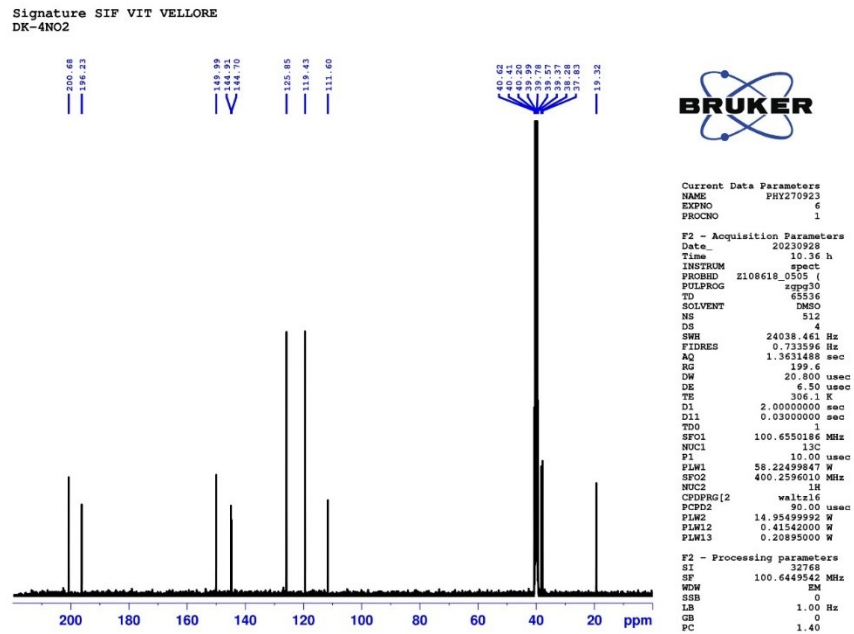

Fig. S36  $^{13}\text{C}$  NMR spectra of 4g



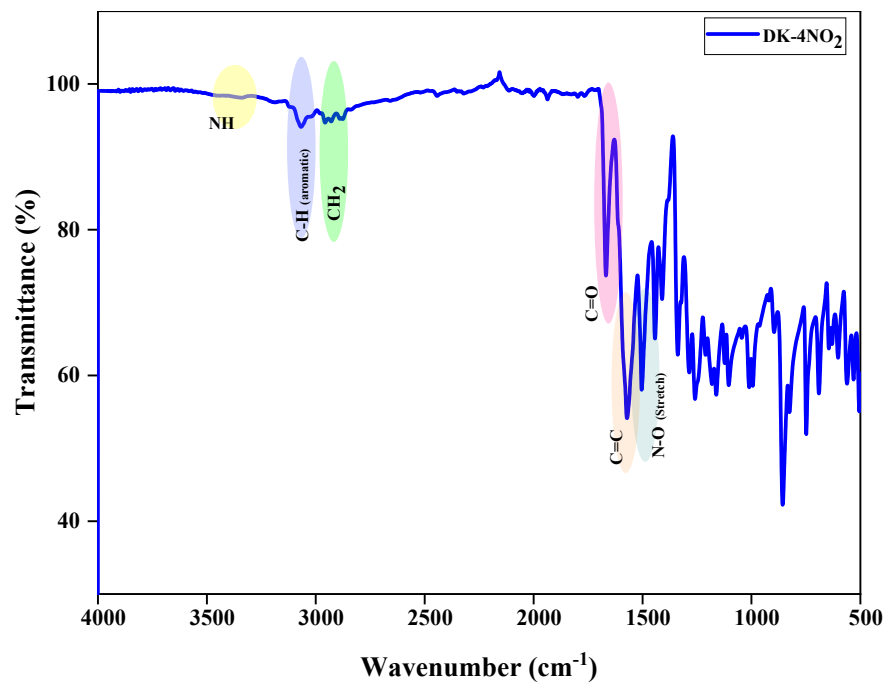

Fig. S37 FT-IR spectra of 4g

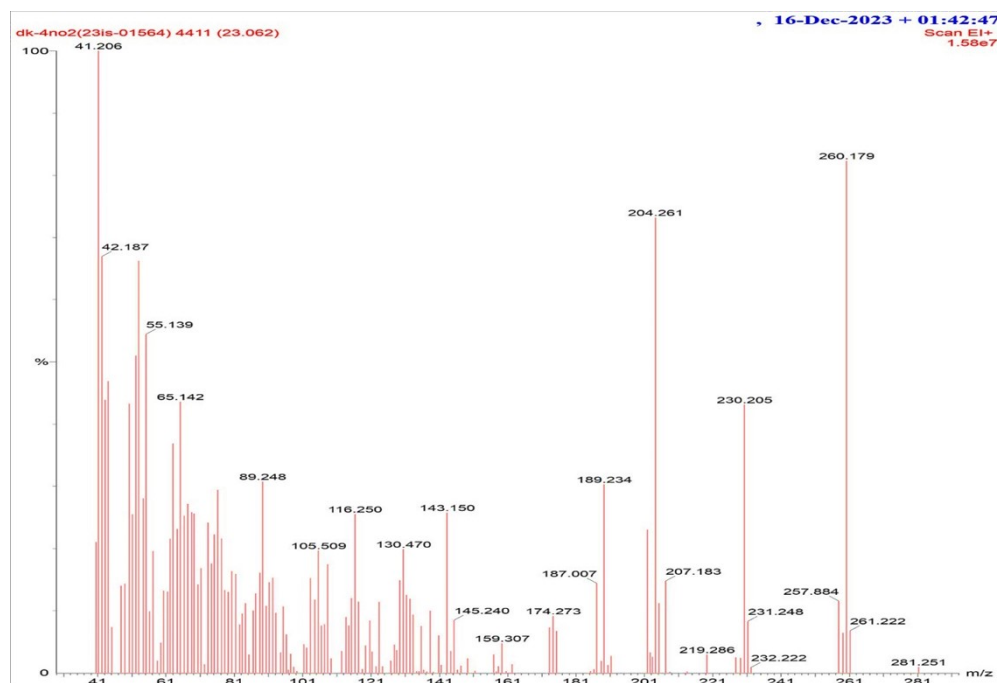

Fig. S38 GC-MS spectra of 4g

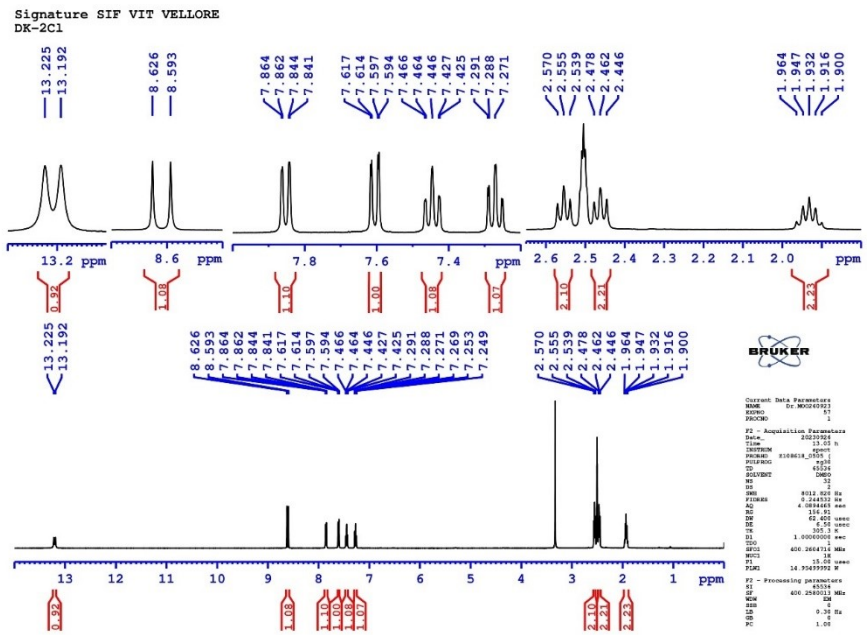

Fig. S39 <sup>1</sup>H NMR spectra of 4h

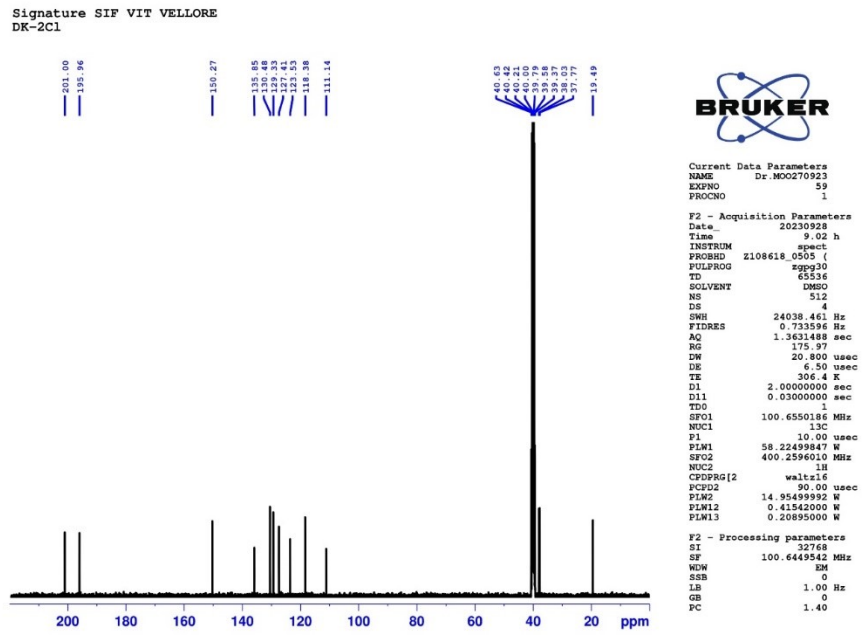

Fig. S40 <sup>13</sup>C NMR spectra of 4h

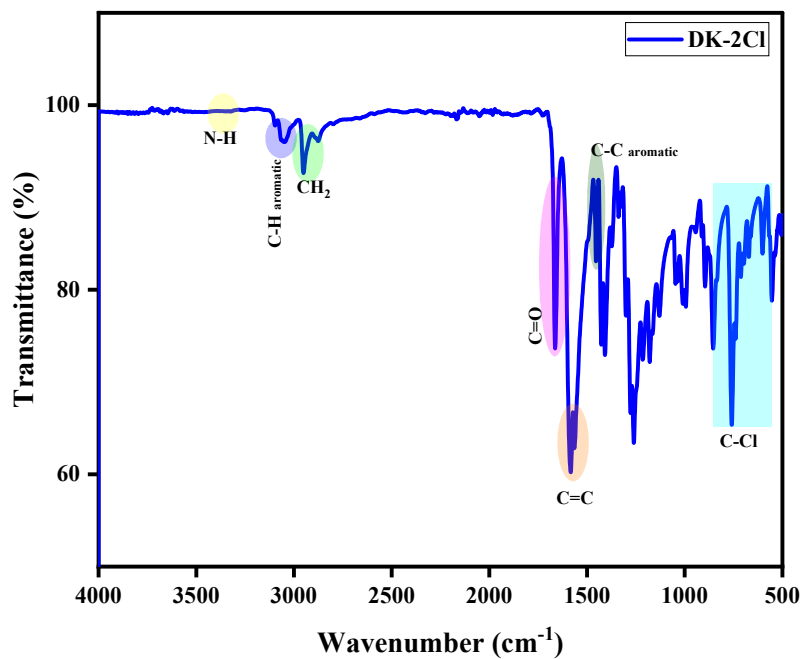

Fig. S41 FT-IR spectra of 4h

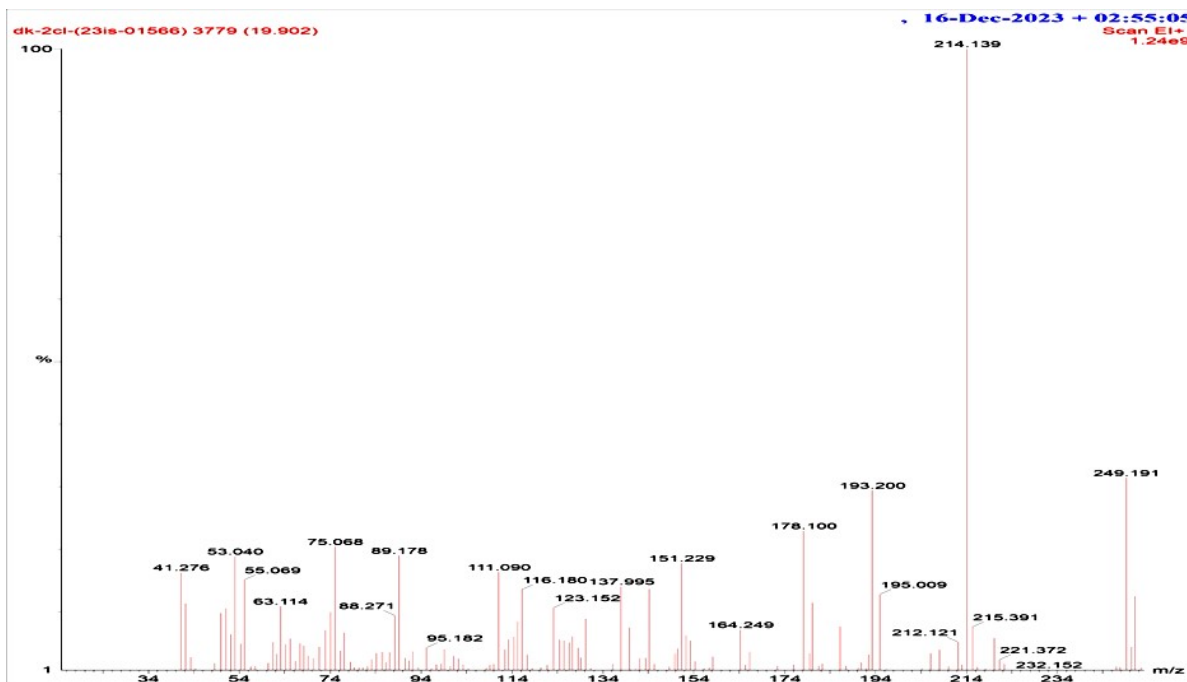

Fig. S42 GC-MS spectra of 4h

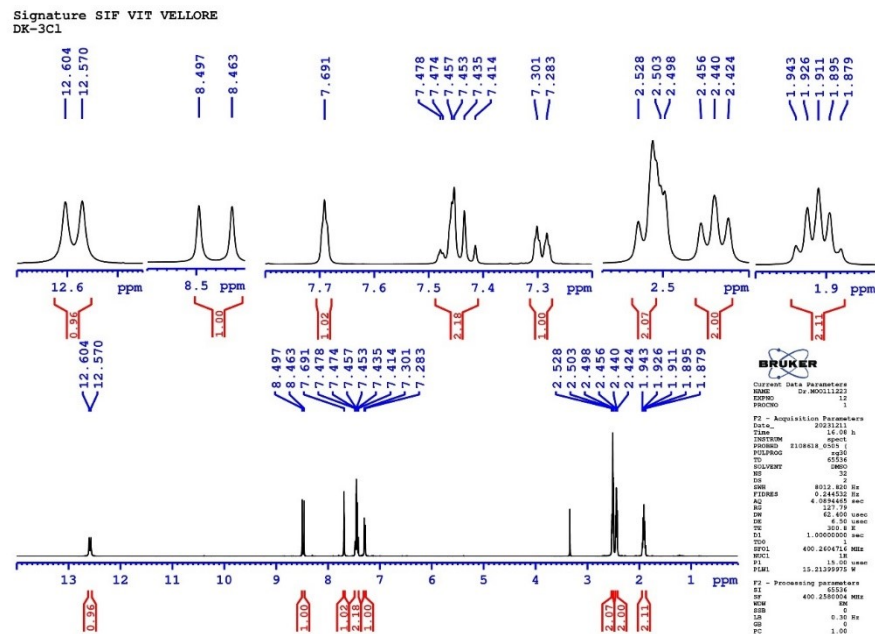

Fig. S43 <sup>1</sup>H NMR spectra of **4i**

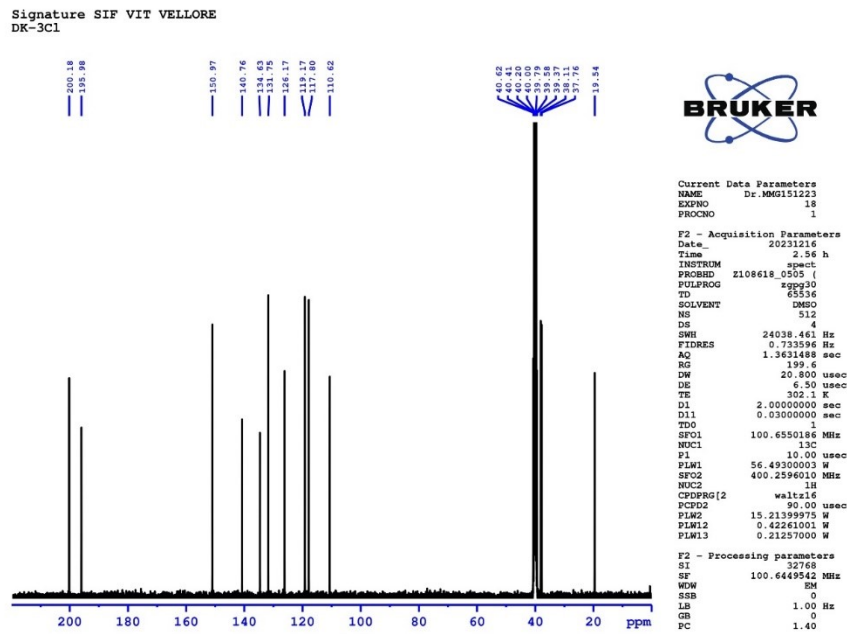

Fig. S44 <sup>13</sup>C NMR spectra of **4i**

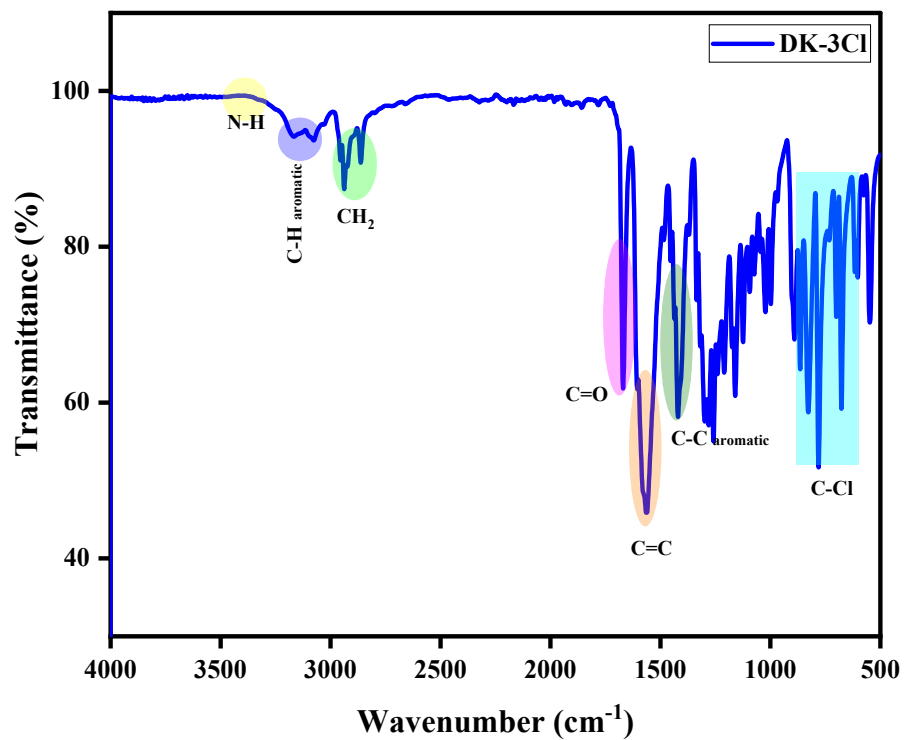

Fig. S45 FT-IR spectra of 4i

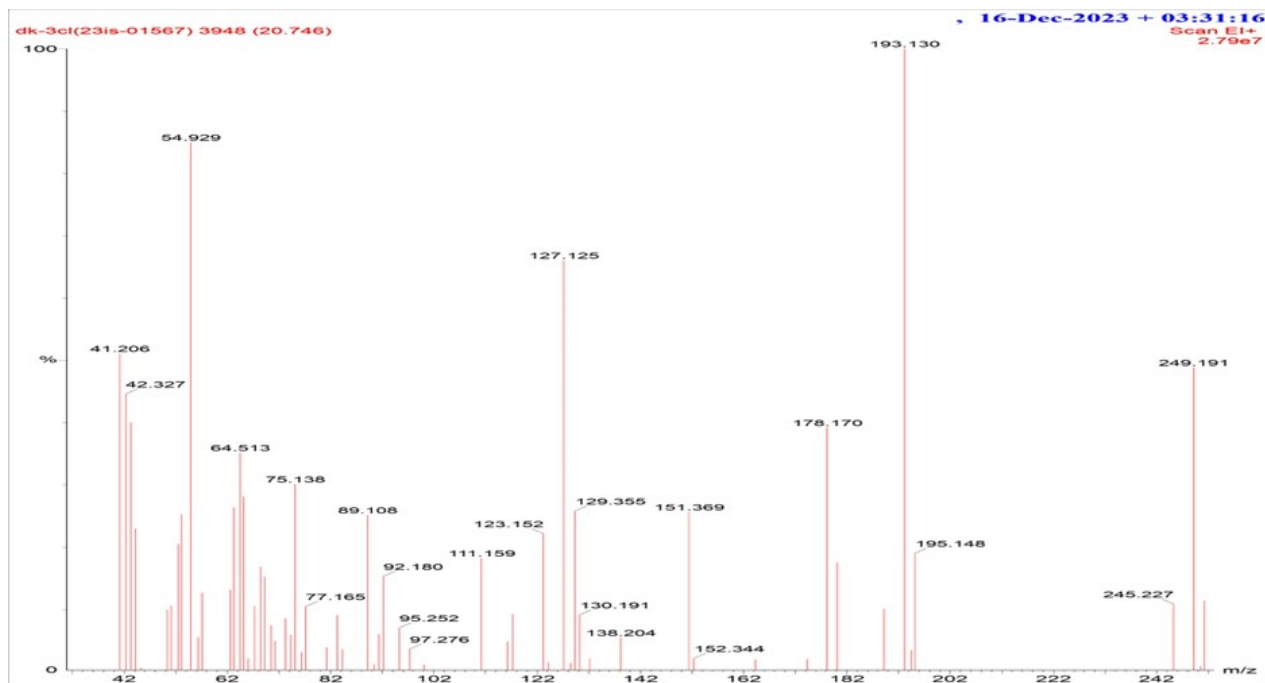

Fig. S46 GC-MS spectra of 4i

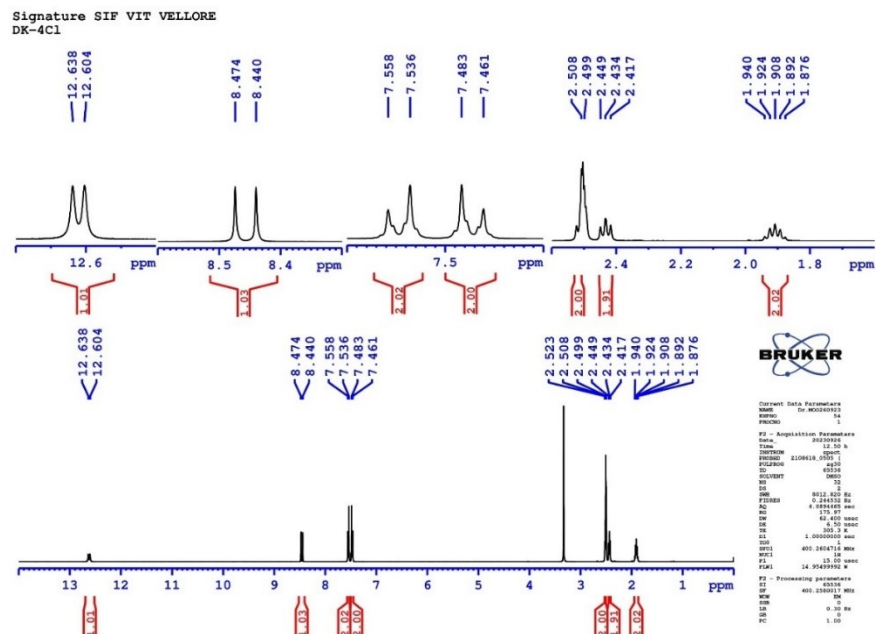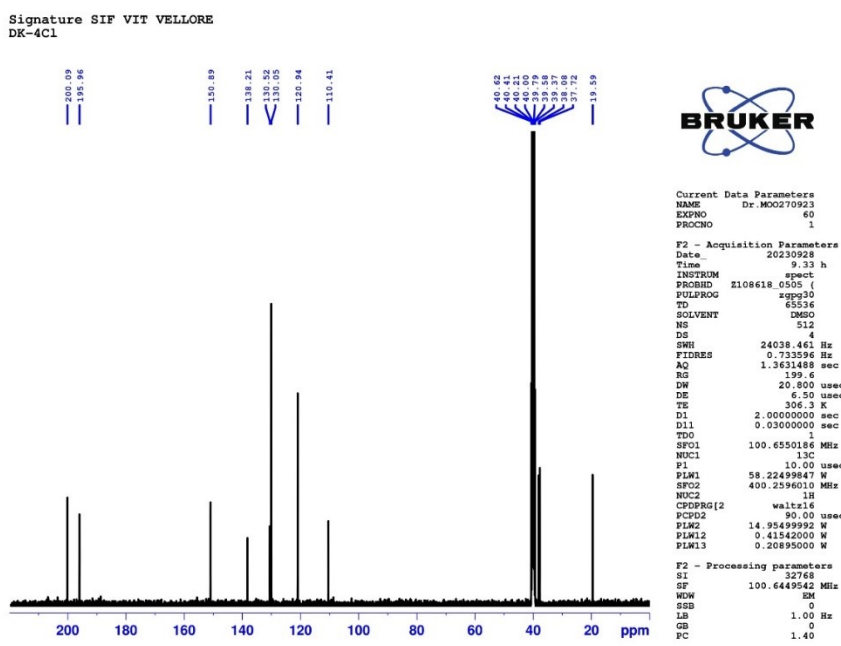

Fig. S47 <sup>1</sup>H NMR spectra of 4j

Fig. S48 <sup>13</sup>C NMR spectra of 4j

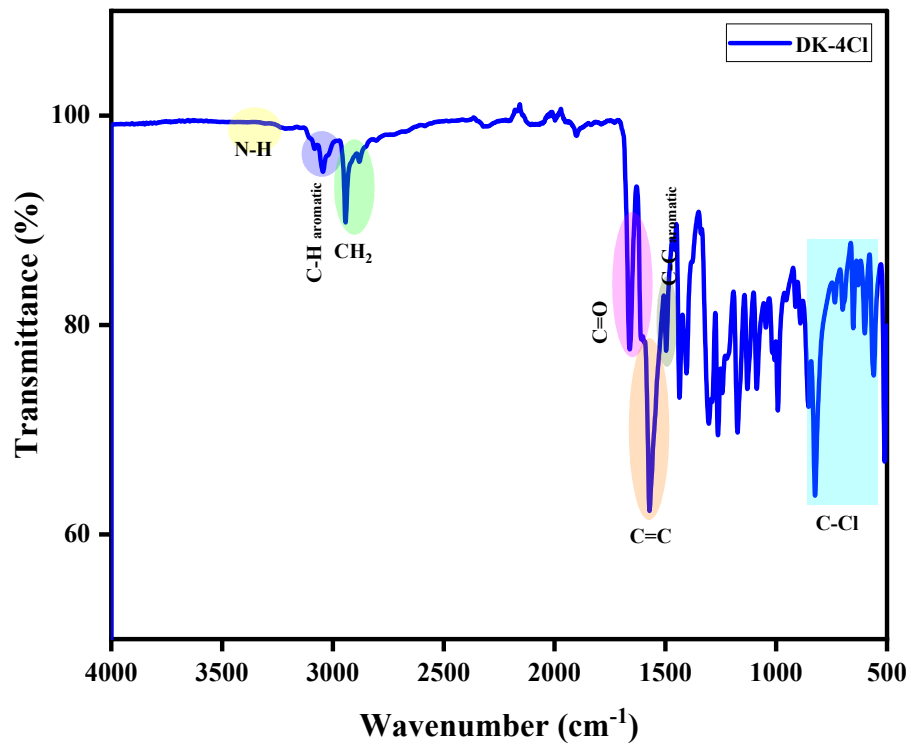

Fig. S49 FT-IR spectra of 4j

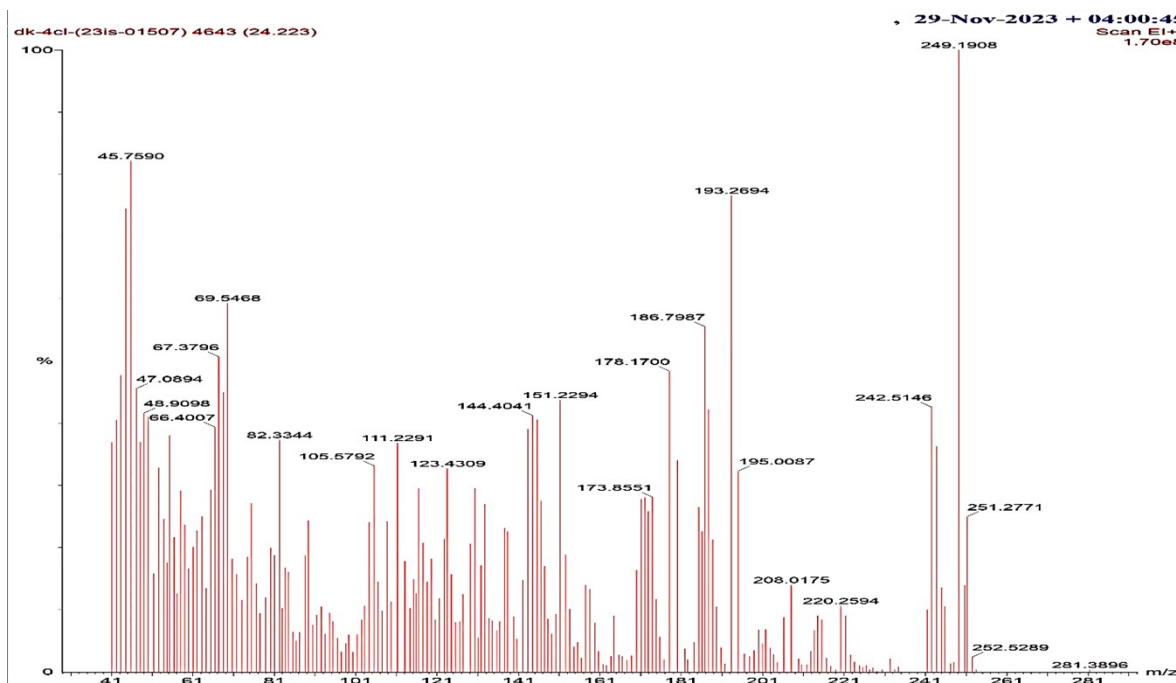

Fig. S50 GC-MS spectra of 4j

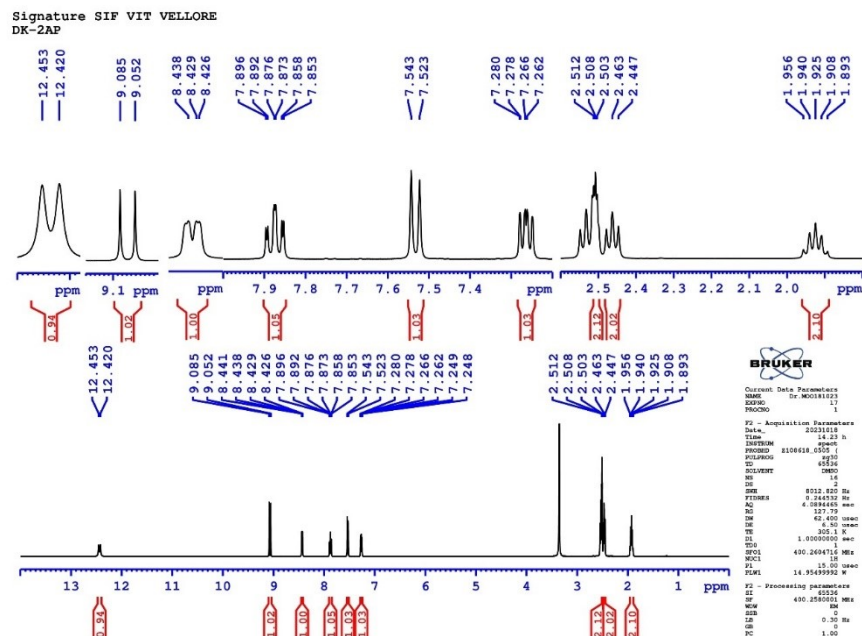

Fig. S51 <sup>1</sup>H NMR spectra of 4k

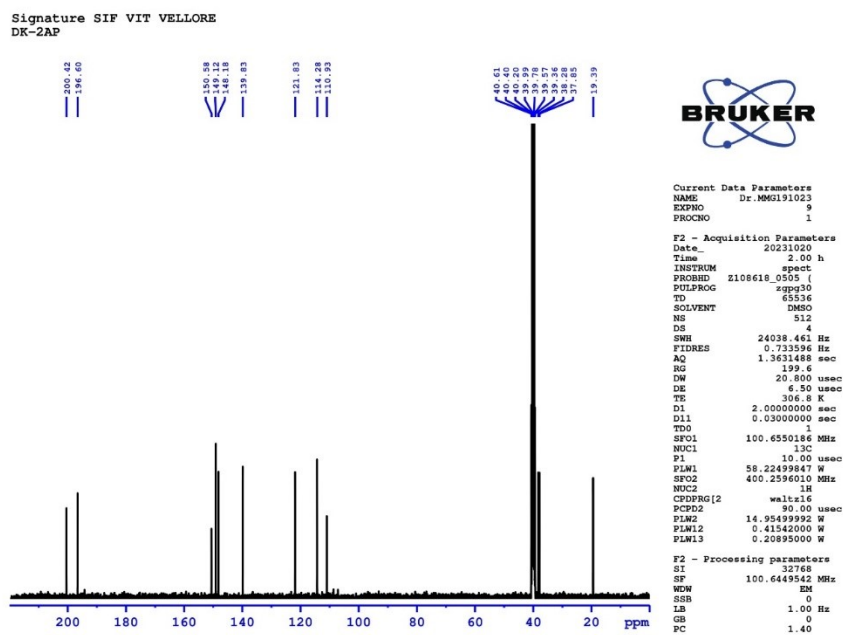

Fig. S52 <sup>13</sup>C NMR spectra of 4k



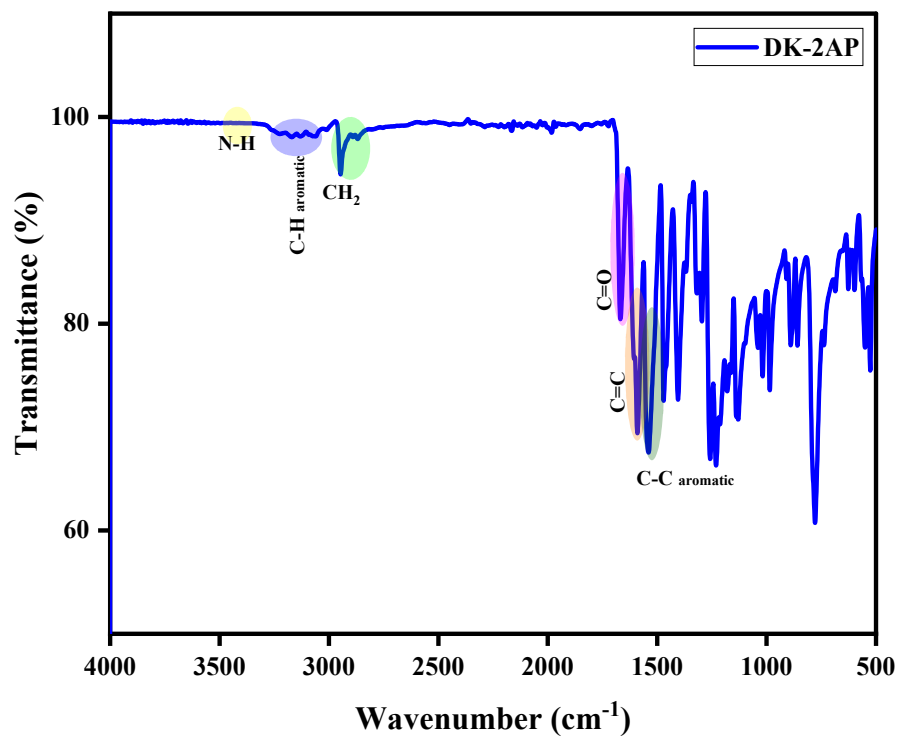

Fig. S53 FT-IR spectra of 4k

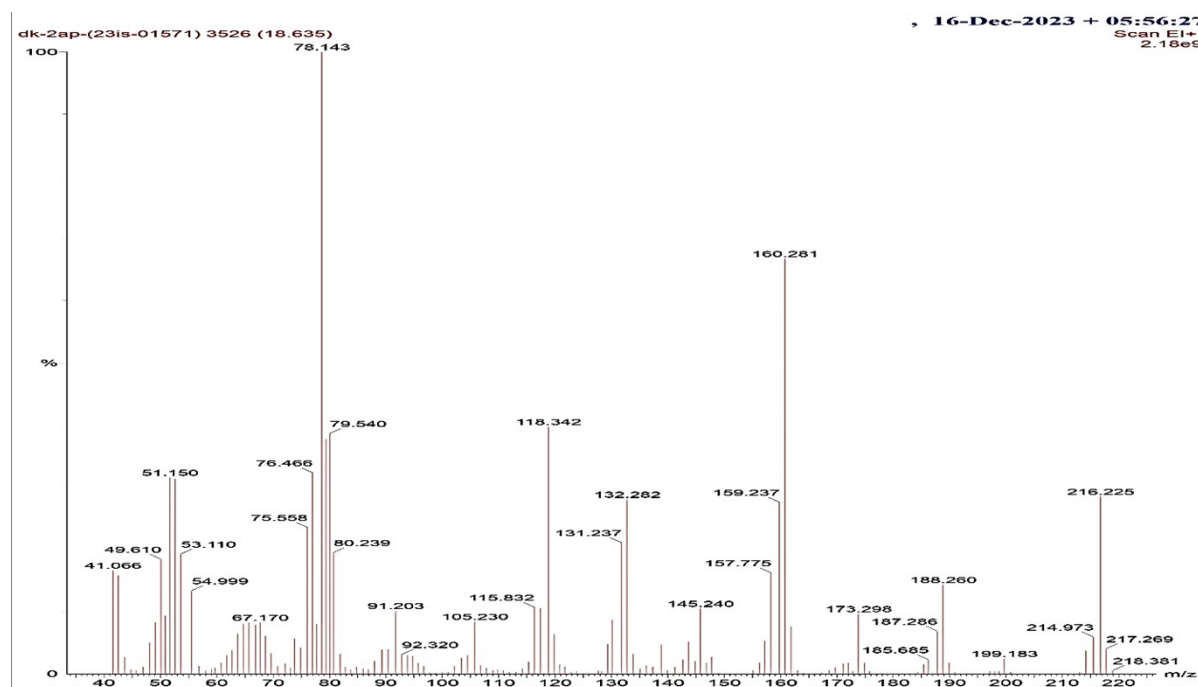

Fig. S54 GC-MS spectra of 4k



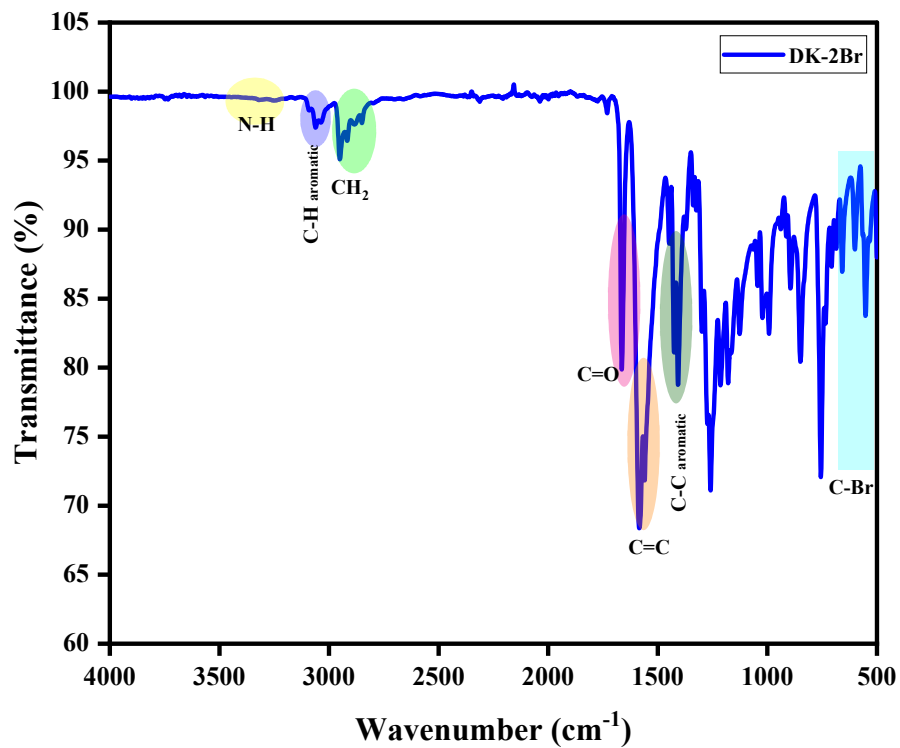

Fig. S57 FT-IR spectra of **4l**

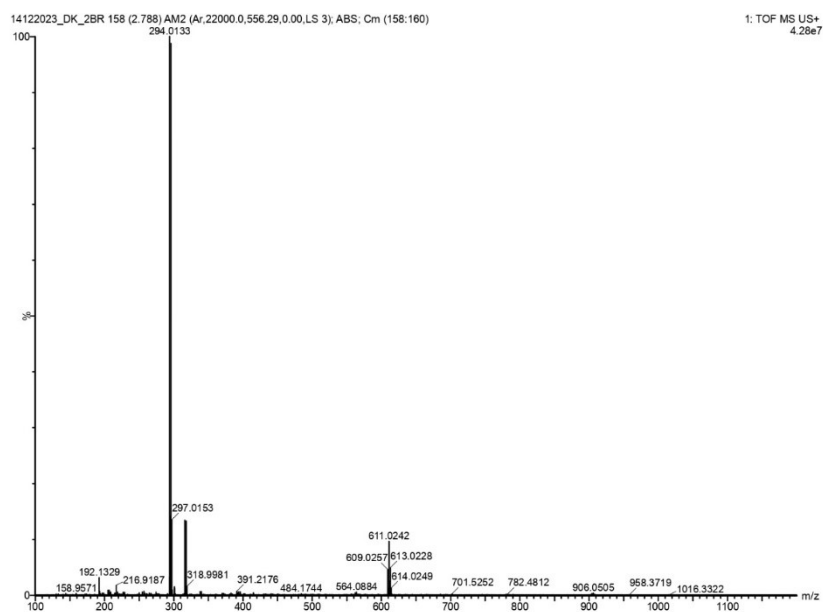

Fig. S58 HR-MS spectra of **4l**

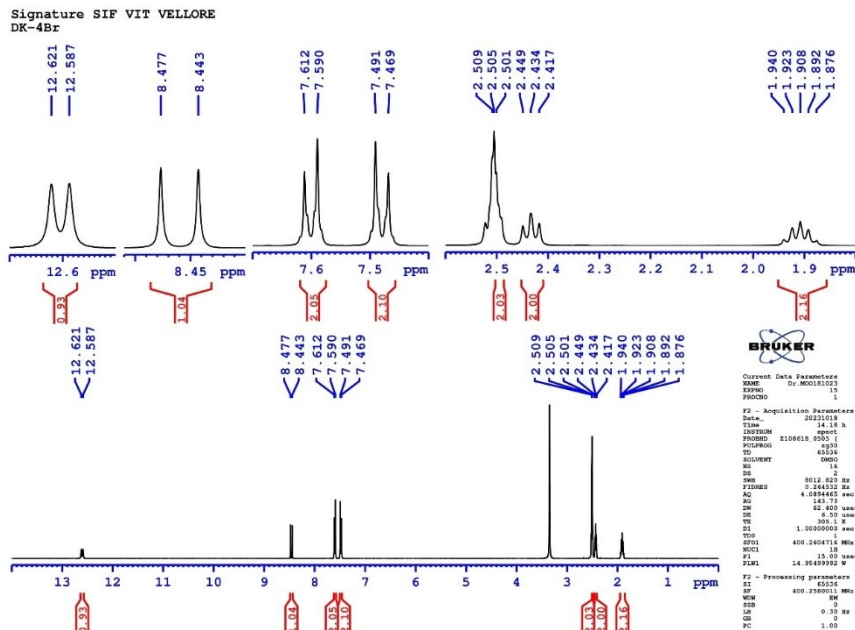

Fig. S59 <sup>1</sup>H NMR spectra of 4m

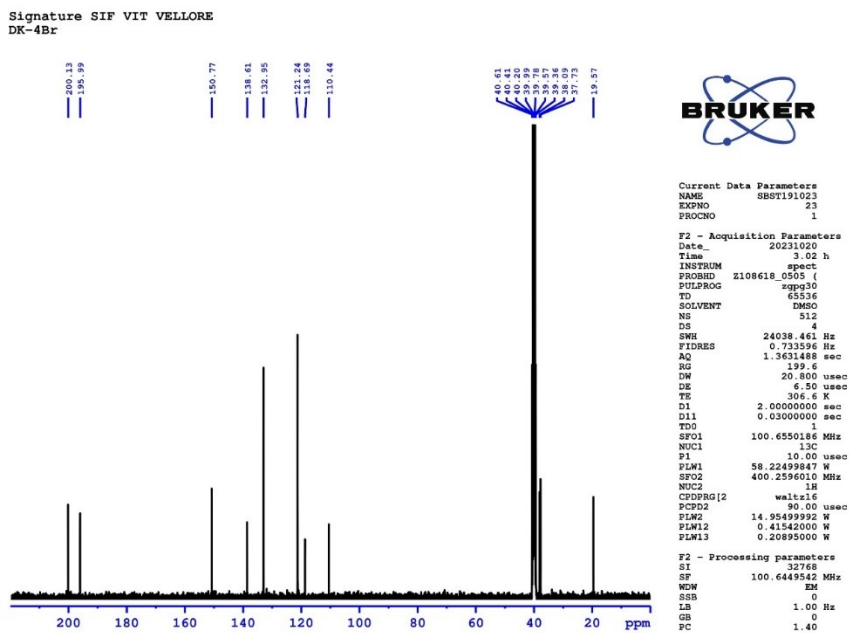

Fig. S60 <sup>13</sup>C NMR spectra of 4m

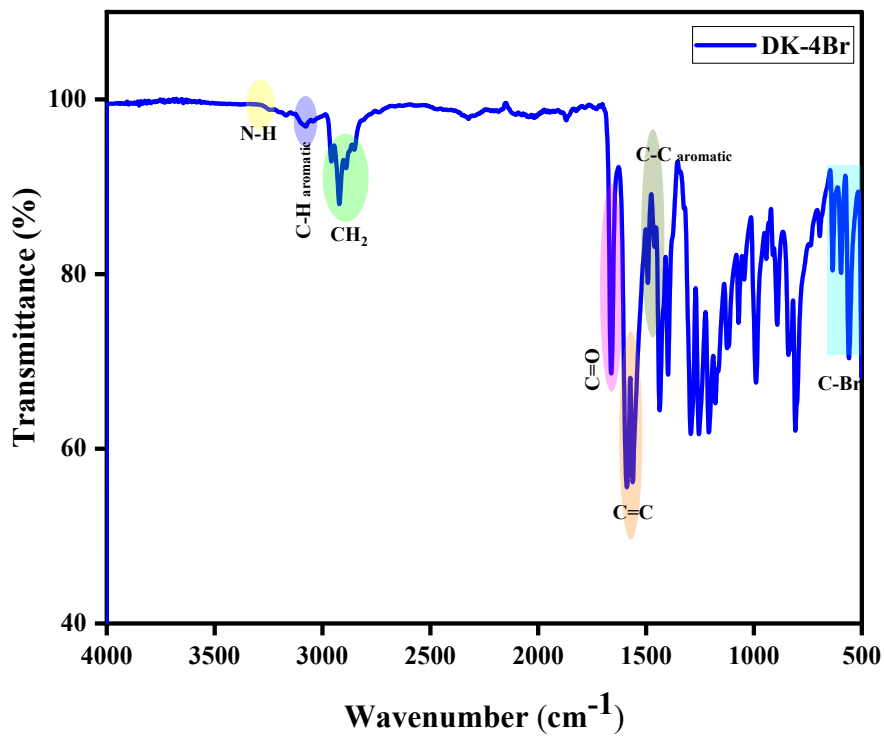

**Fig. S61** FT-IR spectra of **4m**

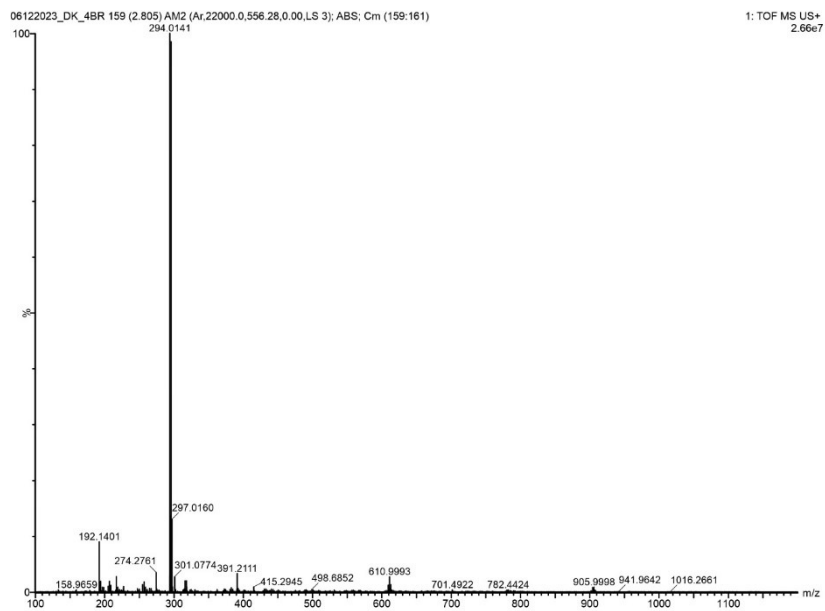

**Fig. S62** HR-MS spectra of **4m**



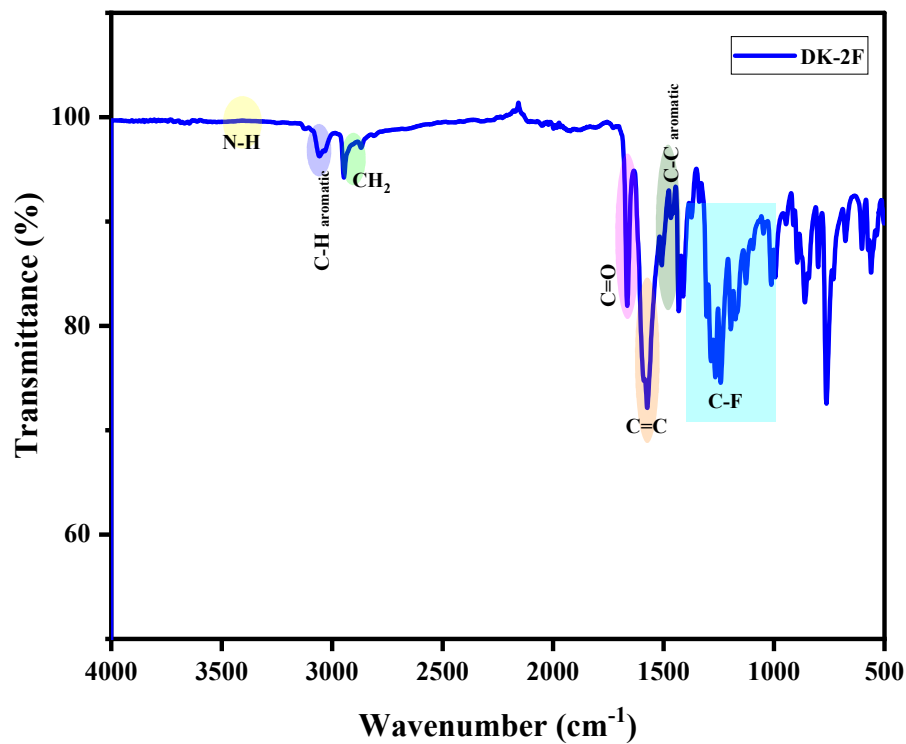

Fig. S65 FT-IR spectra of **4n**

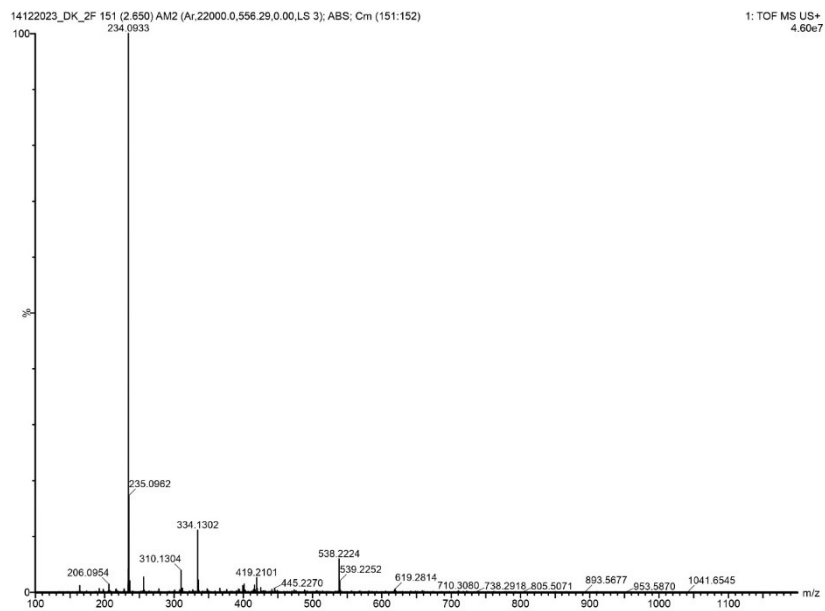

Fig. S66 HR-MS spectra of **4n**





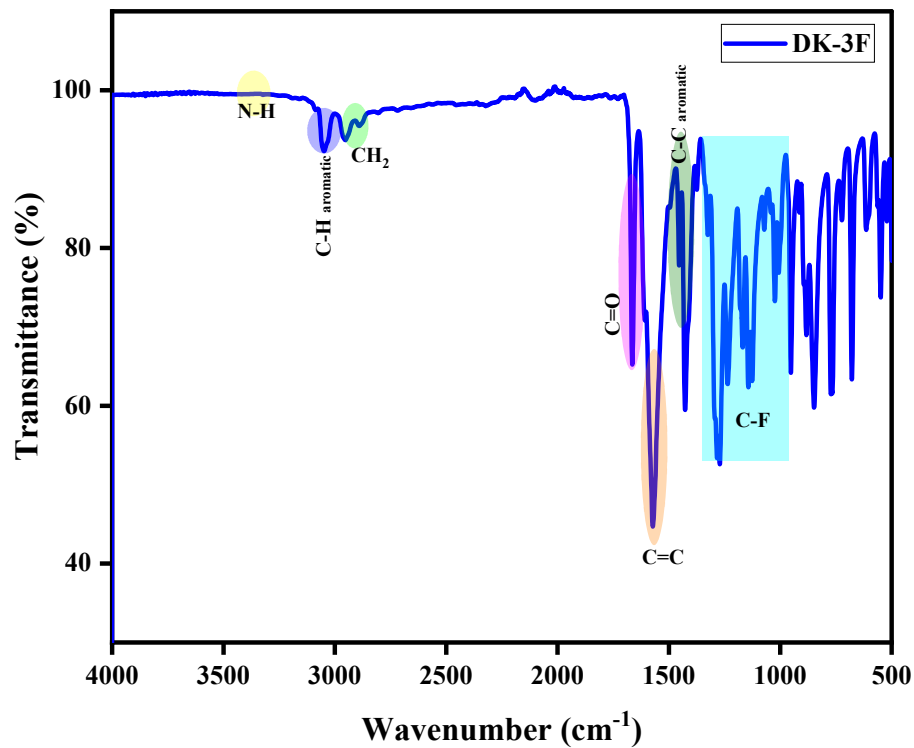

Fig. S69 FT-IR spectra of 4o

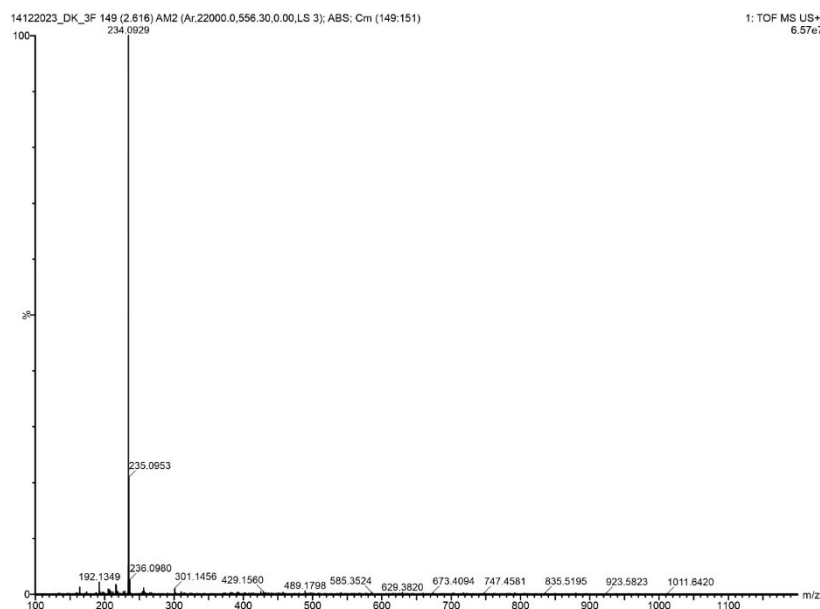

Fig. S70 HR-MS spectra of 4o



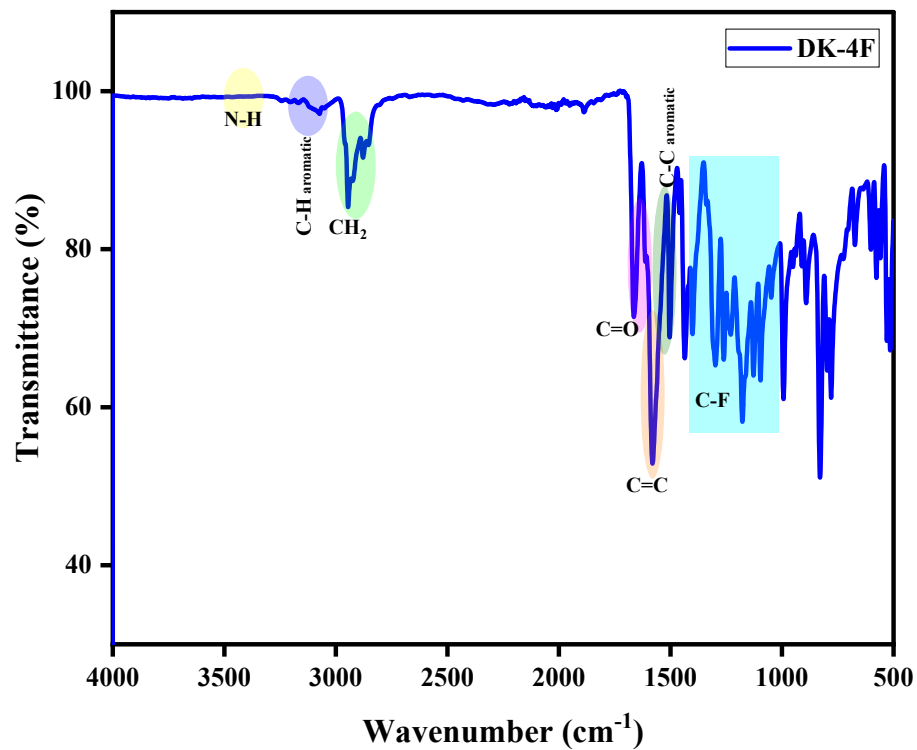

**Fig. S73** FT-IR spectra of **4p**

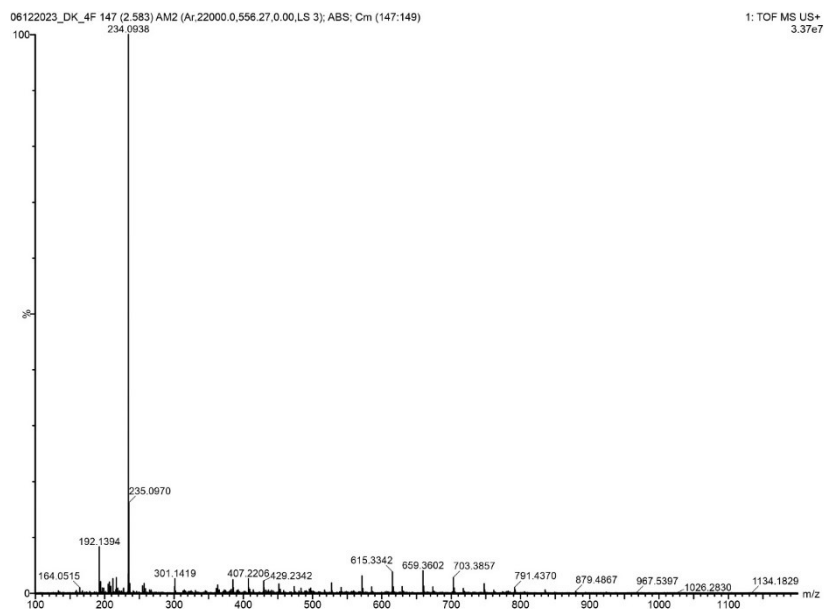

**Fig. S74** HR-MS spectra of **4p**

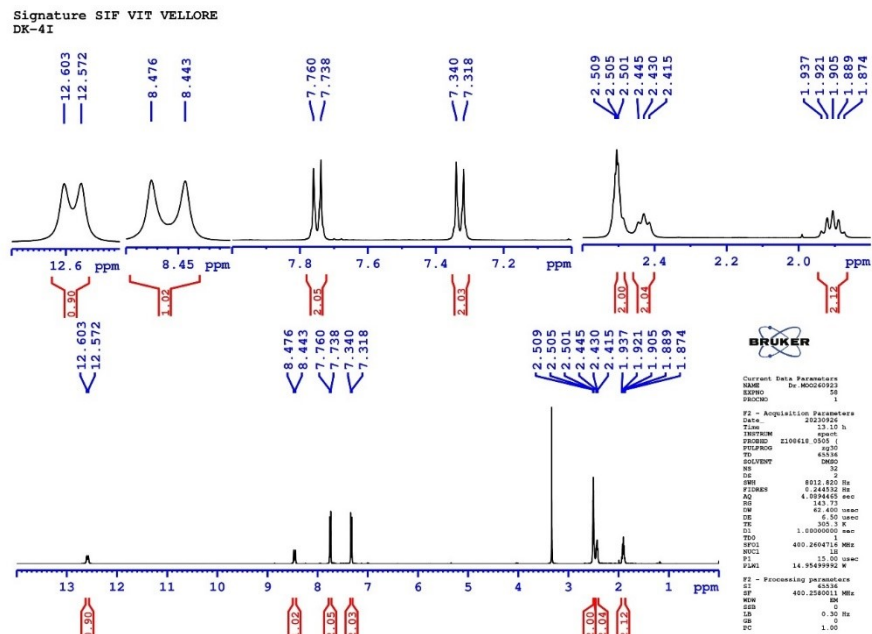

Fig. S75 <sup>1</sup>H NMR spectra of 4q

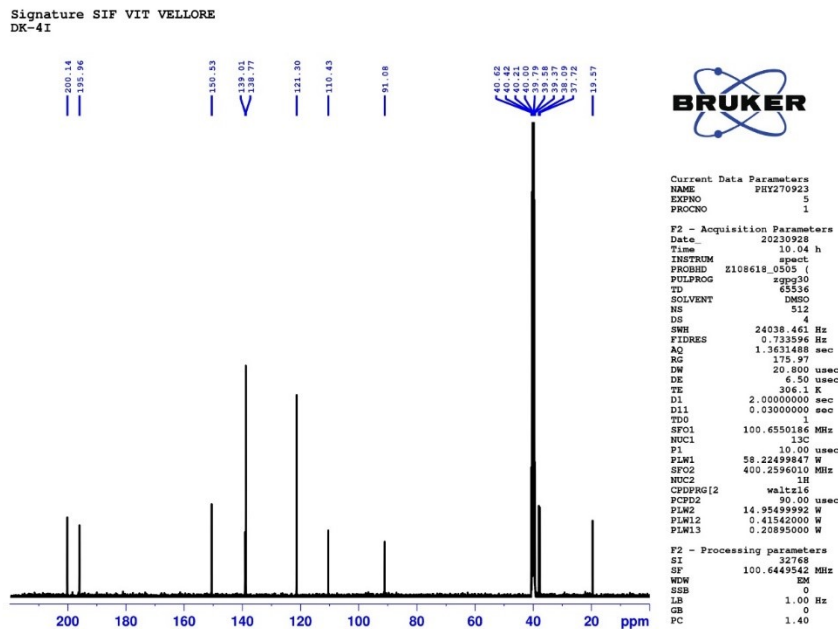

Fig. S76 <sup>13</sup>C NMR spectra of 4q

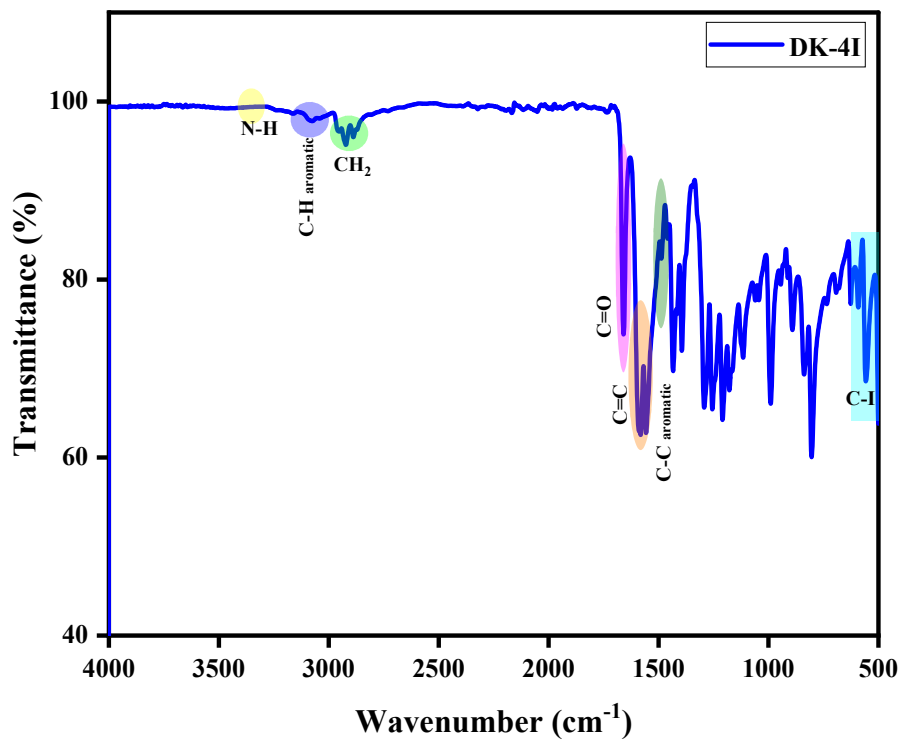

**Fig. S77** FT-IR spectra of **4q**

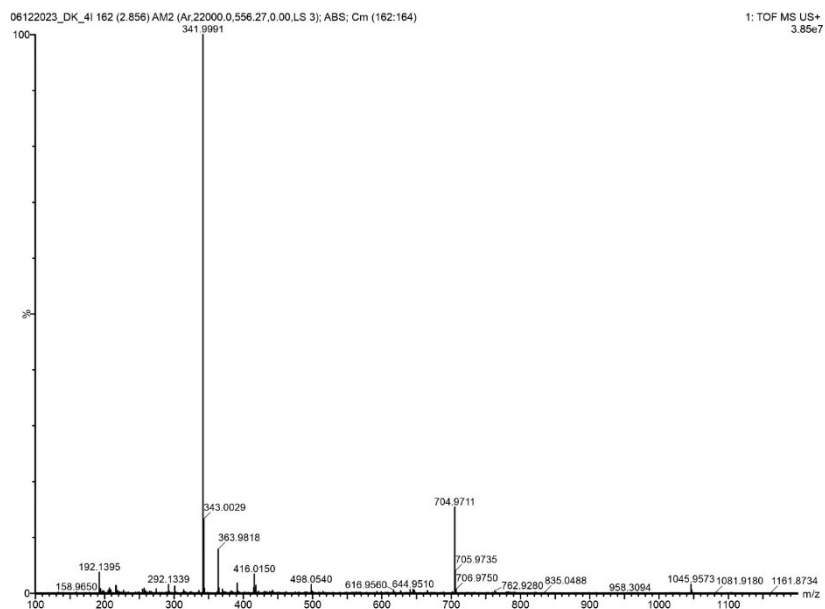

**Fig. S78** HR-MS spectra of **4q**
